# Supplementary material for: Synthesis, Fungicidal Activity and Plant Protective Properties of 1,2,3-Thiadiazole and Isothiazole-Based N-acyl-N-arylalaninates
Source: MDPI journal article supplement (doi:10.3390/molecules28010419), 2023-01-03
Supplement: s1 [file s1]

## *Supporting Information*

### **Synthesis, Fungicidal Activity and Plant Protective Properties of 1,2,3-Thiadiazole and Isothiazole-Based *N*-acyl-*N*-arylalaninates**

**Tatiana A. Kalinina <sup>1,\*</sup>, Valeriya I. Balandina <sup>1</sup>, Konstantin L. Obydenov <sup>1</sup>, Pavel A. Slepukhin <sup>2</sup>, Zhijin Fan <sup>3</sup>, Vasiliy A. Bakulev <sup>1</sup> and Tatiana V. Glukhareva <sup>1</sup>**

<sup>1</sup> Ural Federal University named after the first President of Russia B.N. Yeltsin, 19 Mira Street, 620002 Ekaterinburg, Russia

<sup>2</sup> Postovsky Institute of Organic Synthesis, Ural Branch of Russian Academy of Sciences, 22/20 S. Kovalevskaya Street, 620108 Ekaterinburg, Russia

<sup>3</sup> State Key Laboratory of Elemento-Organic Chemistry, College of Chemistry, Nankai University, No. 94, Weijin Road, 300071 Tianjin, China

\* Correspondence: t.a.kalinina@urfu.ru; v.a.bakulev@urfu.ru; Tel.: +7-3433754818

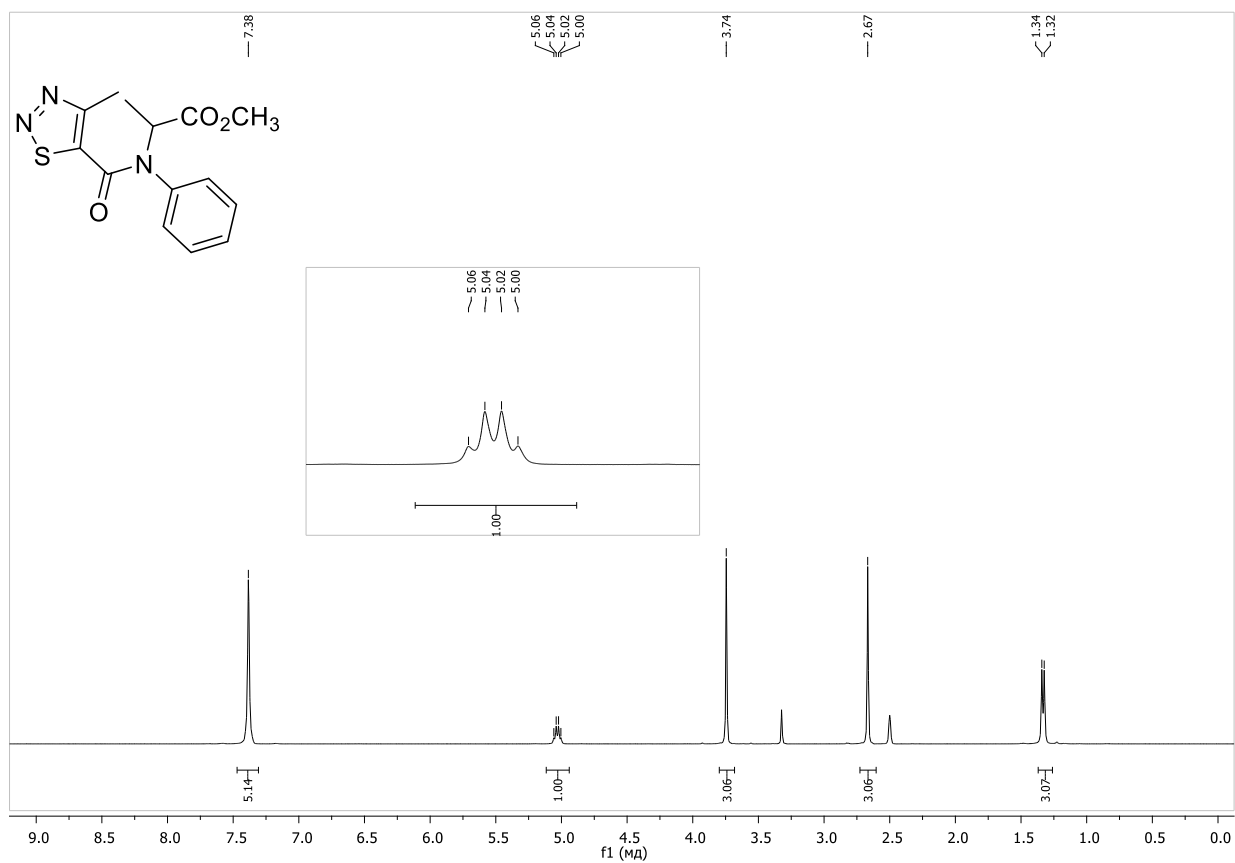

**Figure S1.**  $^1\text{H}$  NMR of compound **1a**

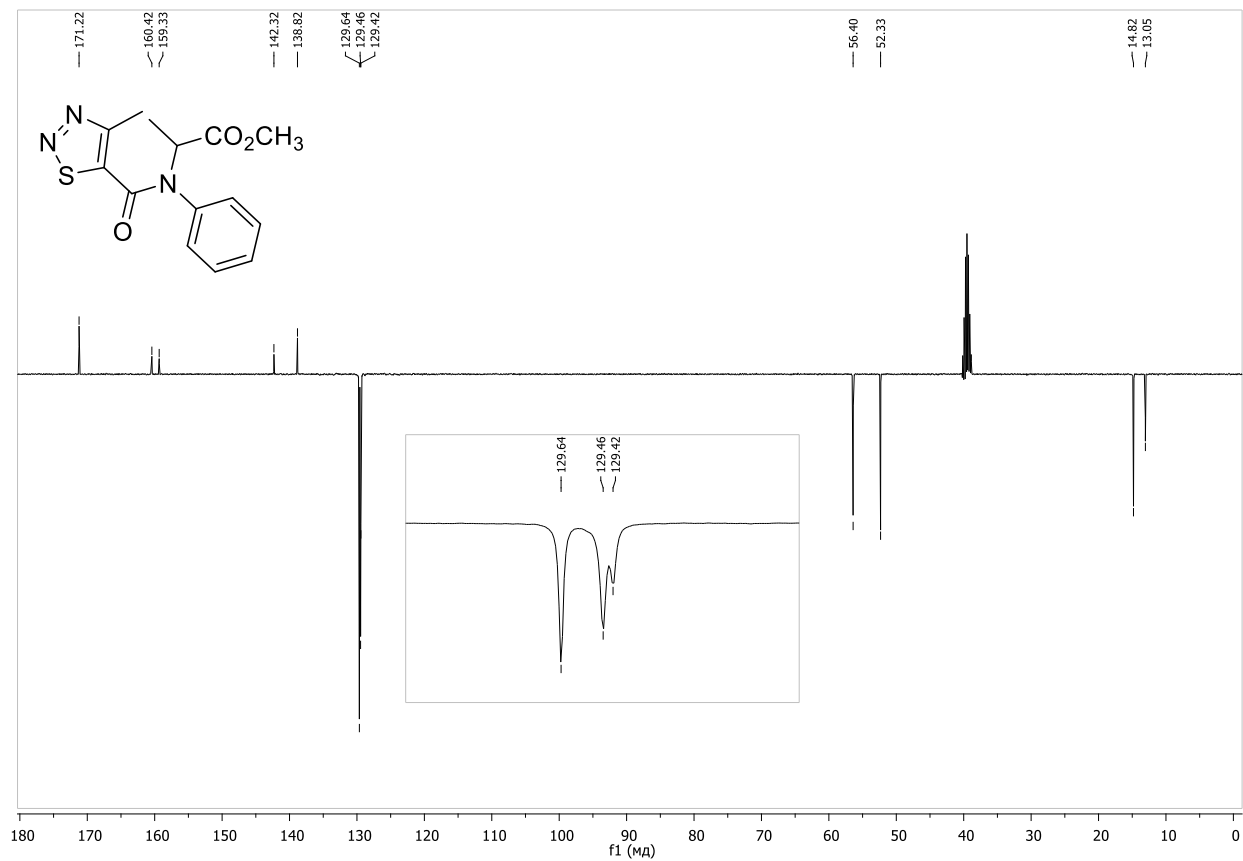

**Figure S2.**  $^{13}\text{C}$  NMR of compound **1a**

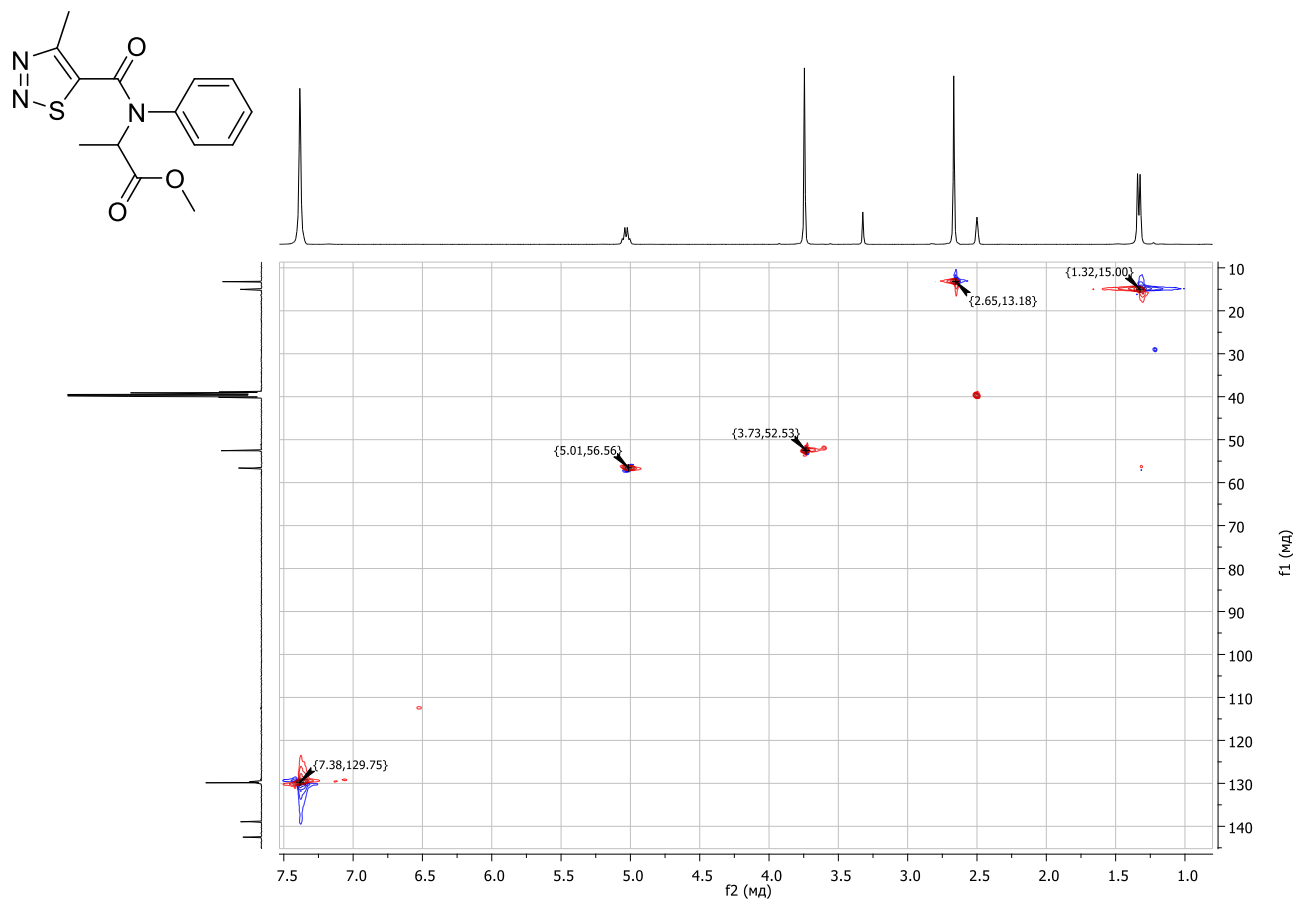

**Figure S3.** Part of the HSQC  $^1\text{H}$ - $^{13}\text{C}$  NMR spectrum of **1a**

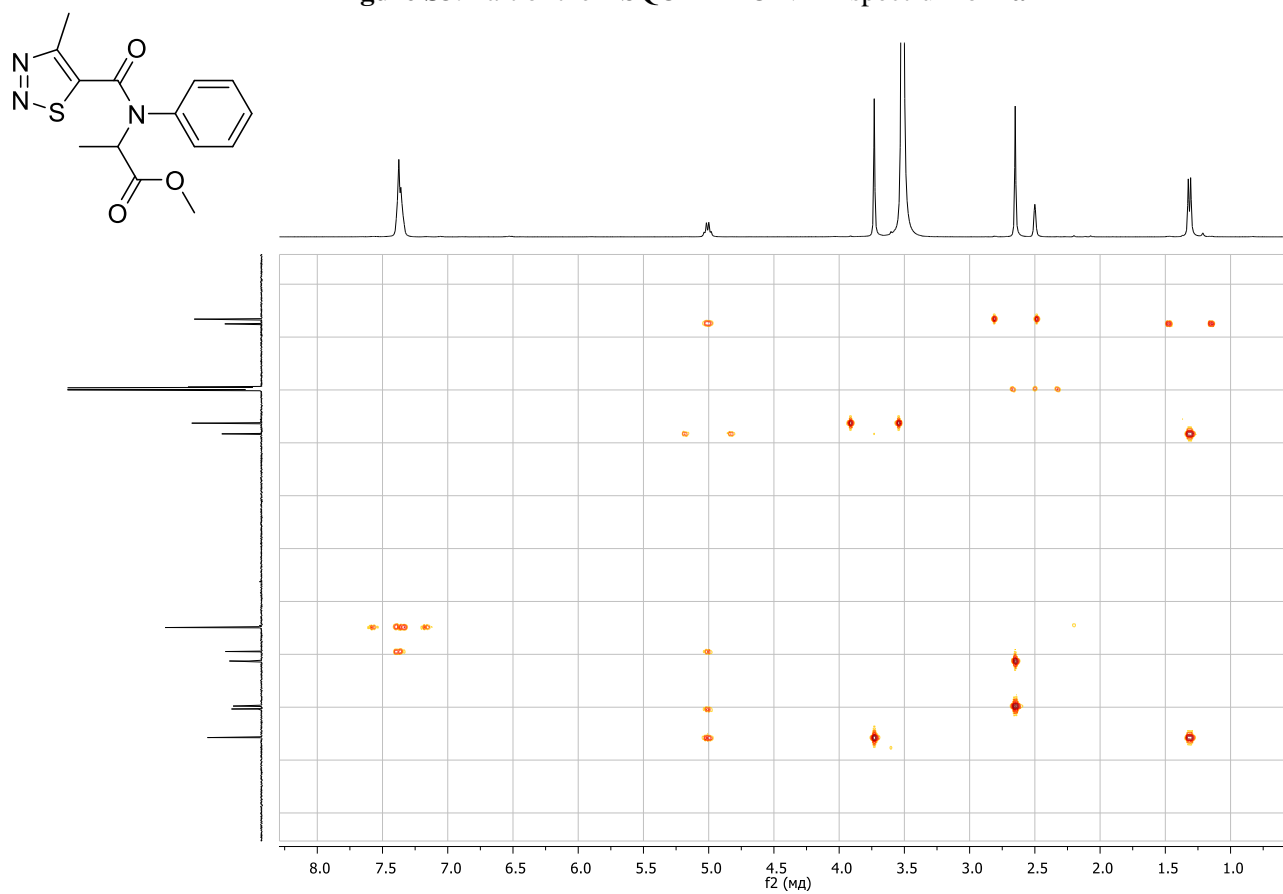

**Figure S4.** The HMBC  $^1\text{H}$ - $^{13}\text{C}$  NMR spectrum of **1a**

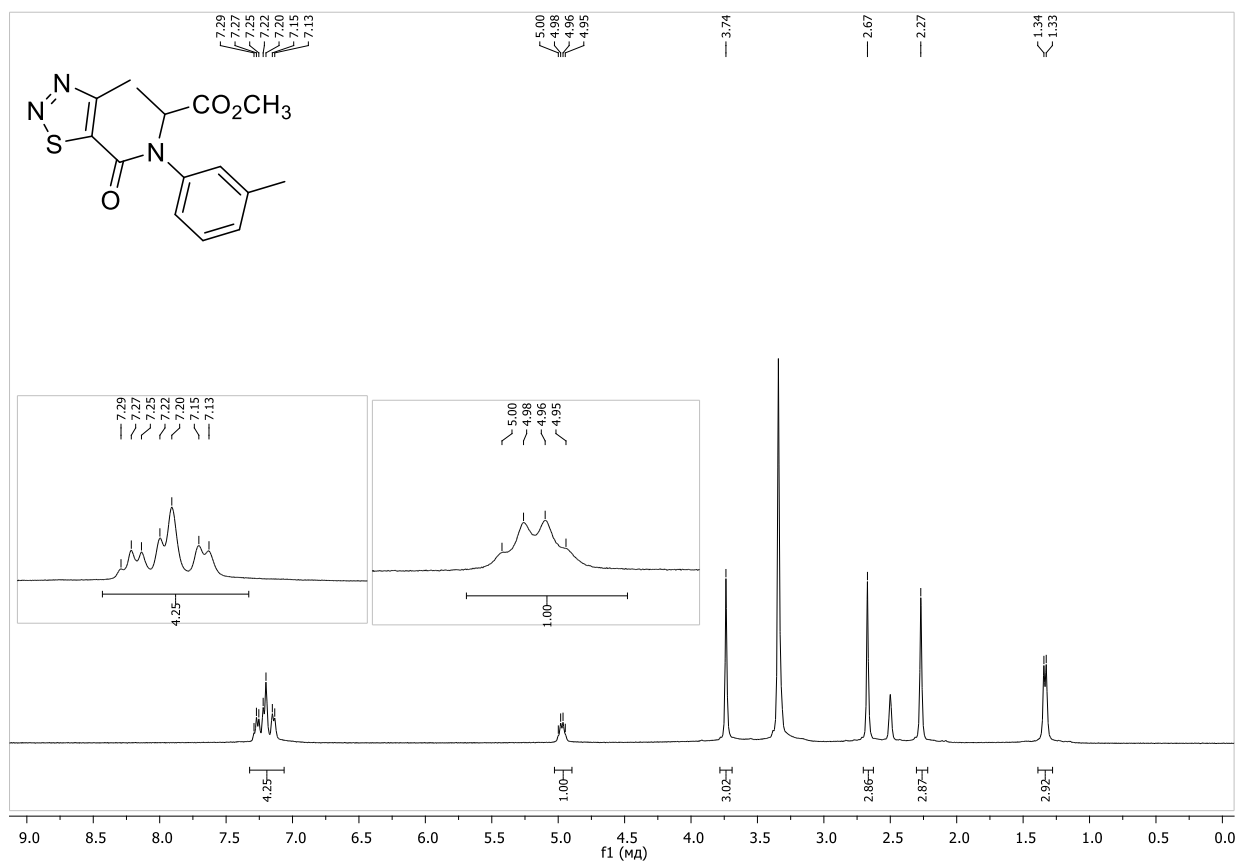

**Figure S5.** <sup>1</sup>H NMR of compound **1b**

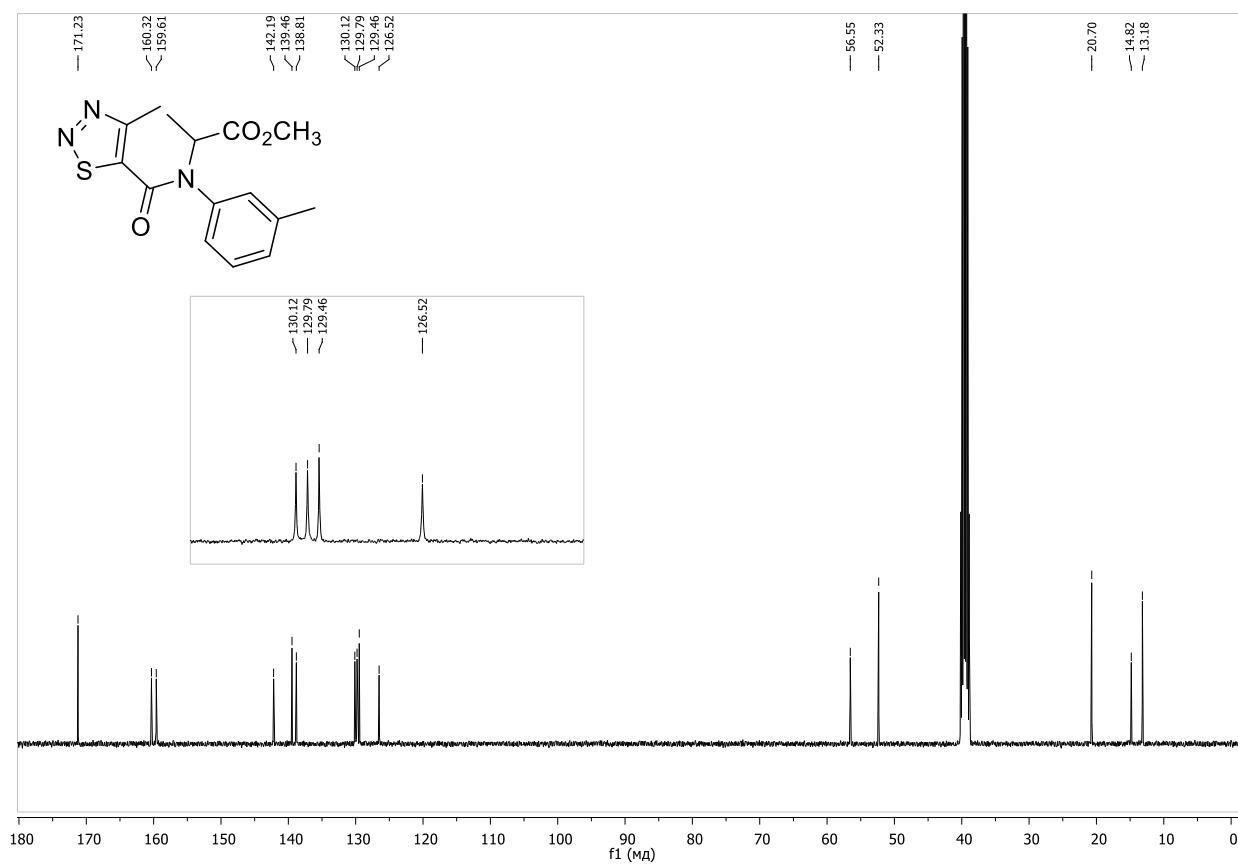

**Figure S6.** <sup>13</sup>C NMR of compound **1b**

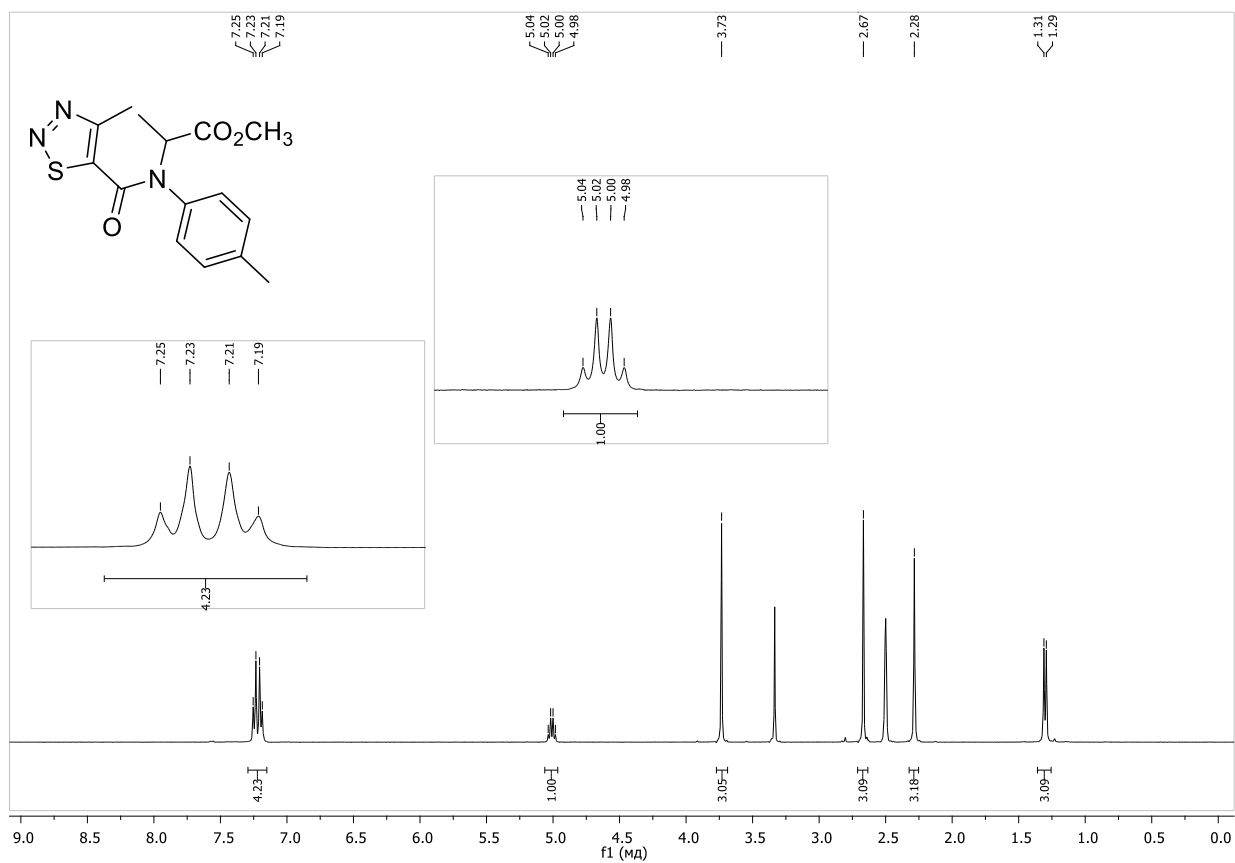

Figure S7. <sup>1</sup>H NMR of compound **1c**

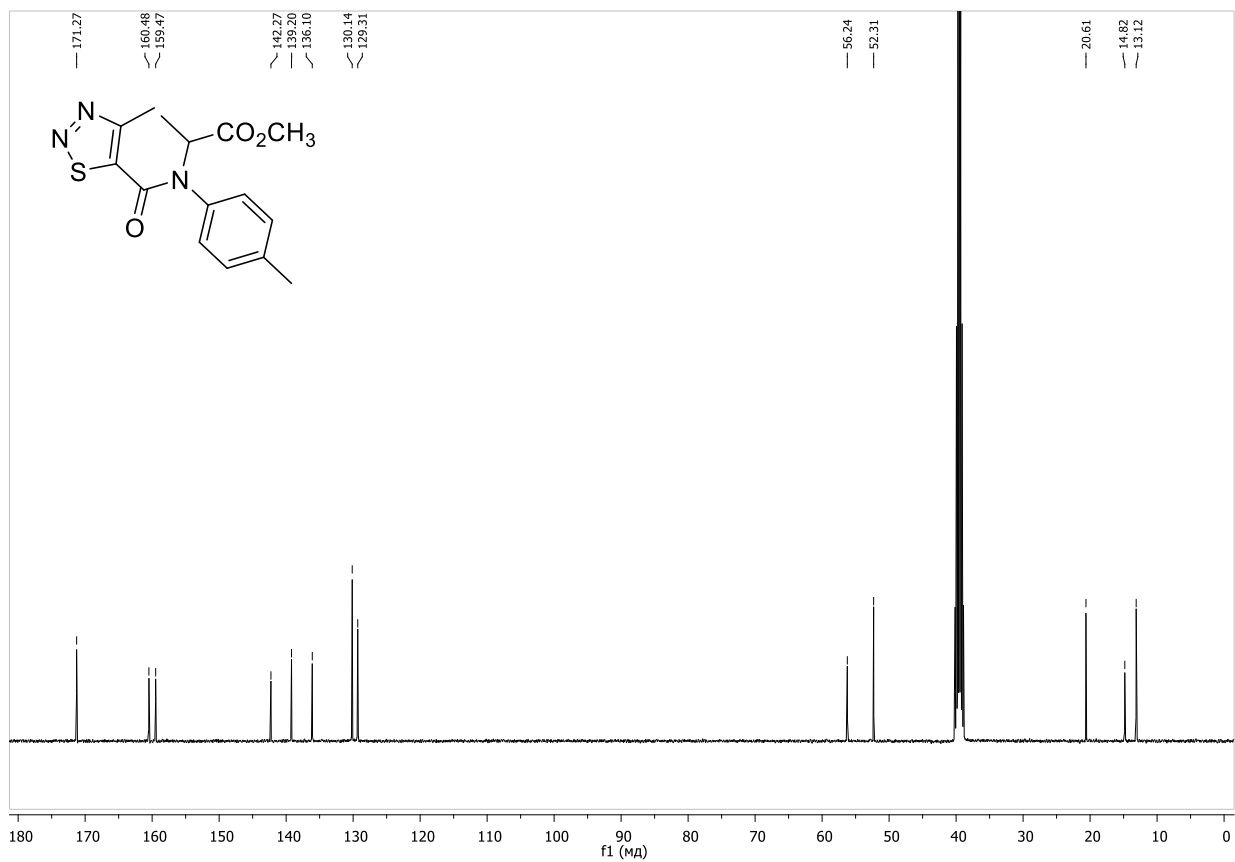

Figure S8. <sup>13</sup>C NMR of compound **1c**

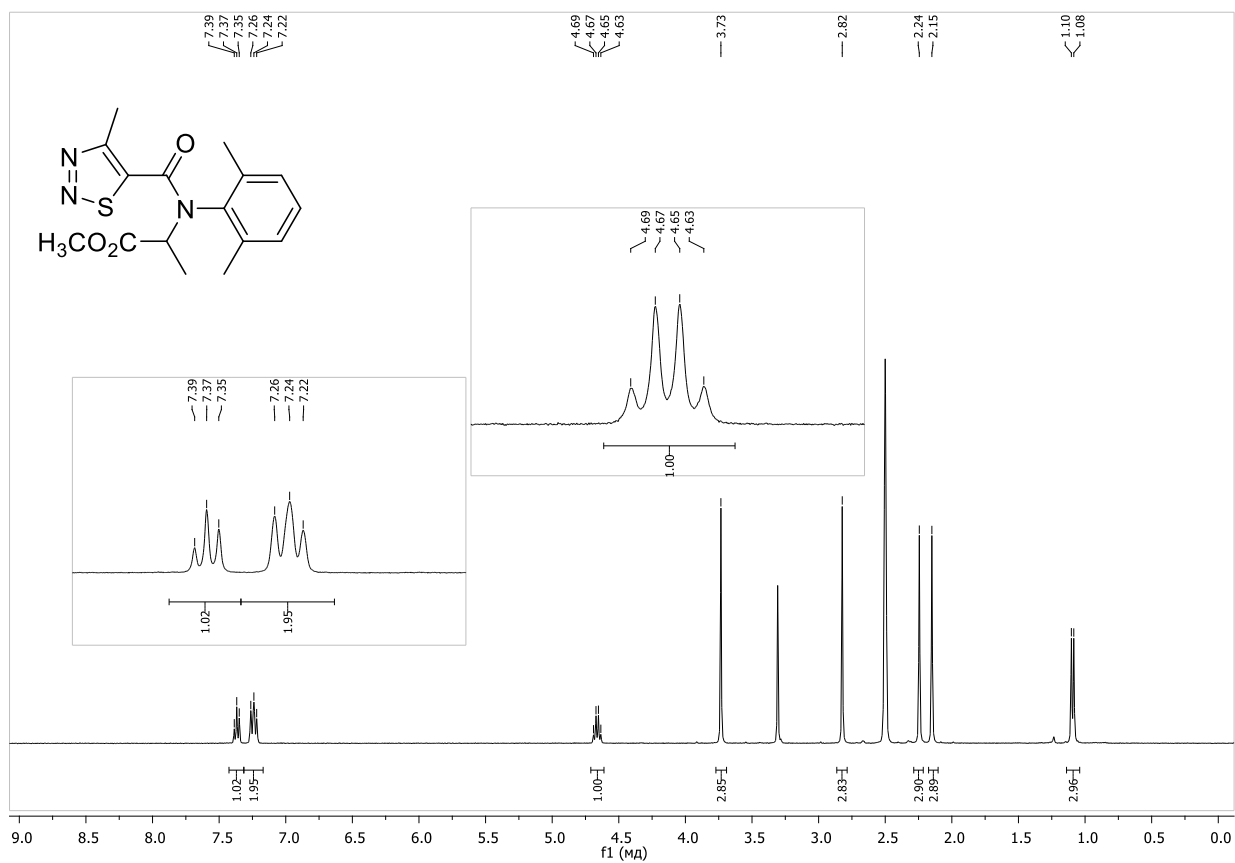

**Figure S9.** <sup>1</sup>H NMR of compound **1d**

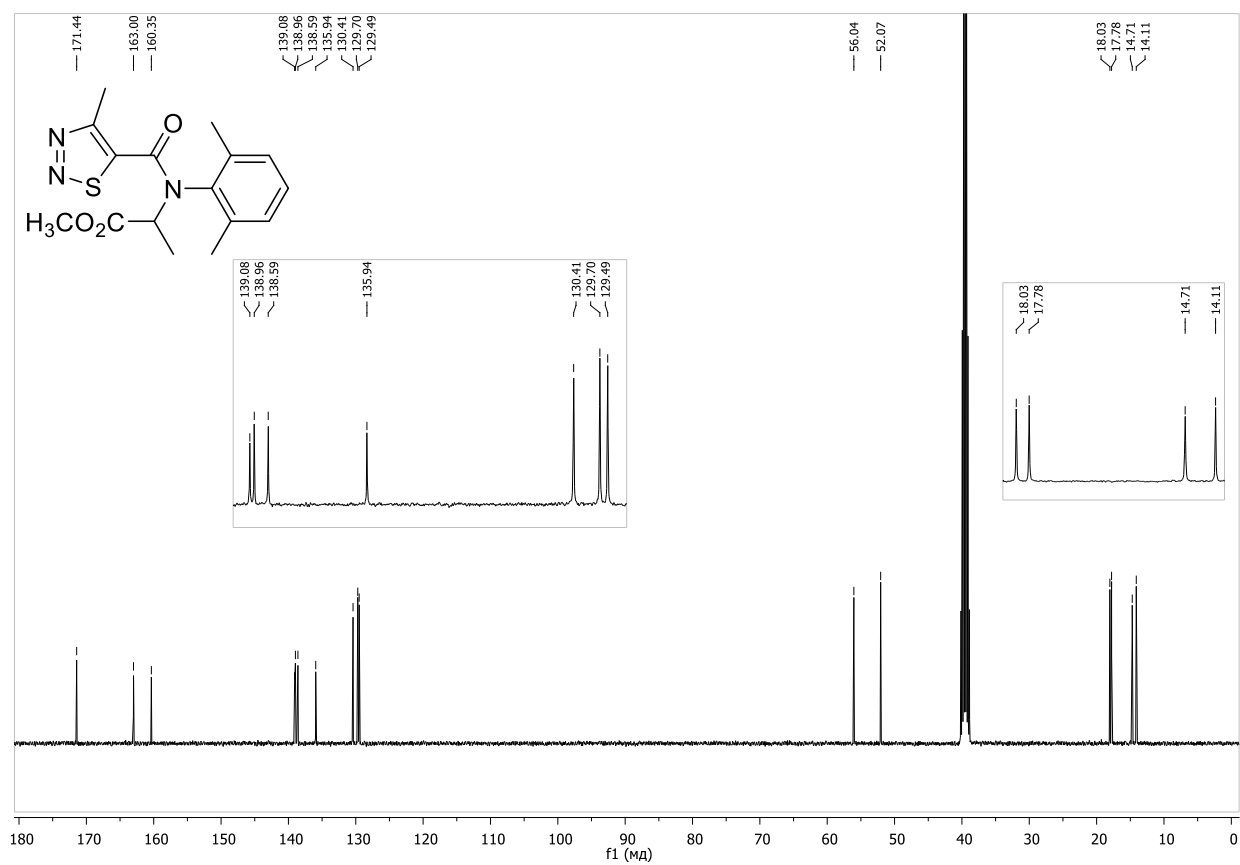

**Figure S10.** <sup>13</sup>C NMR of compound **1d**

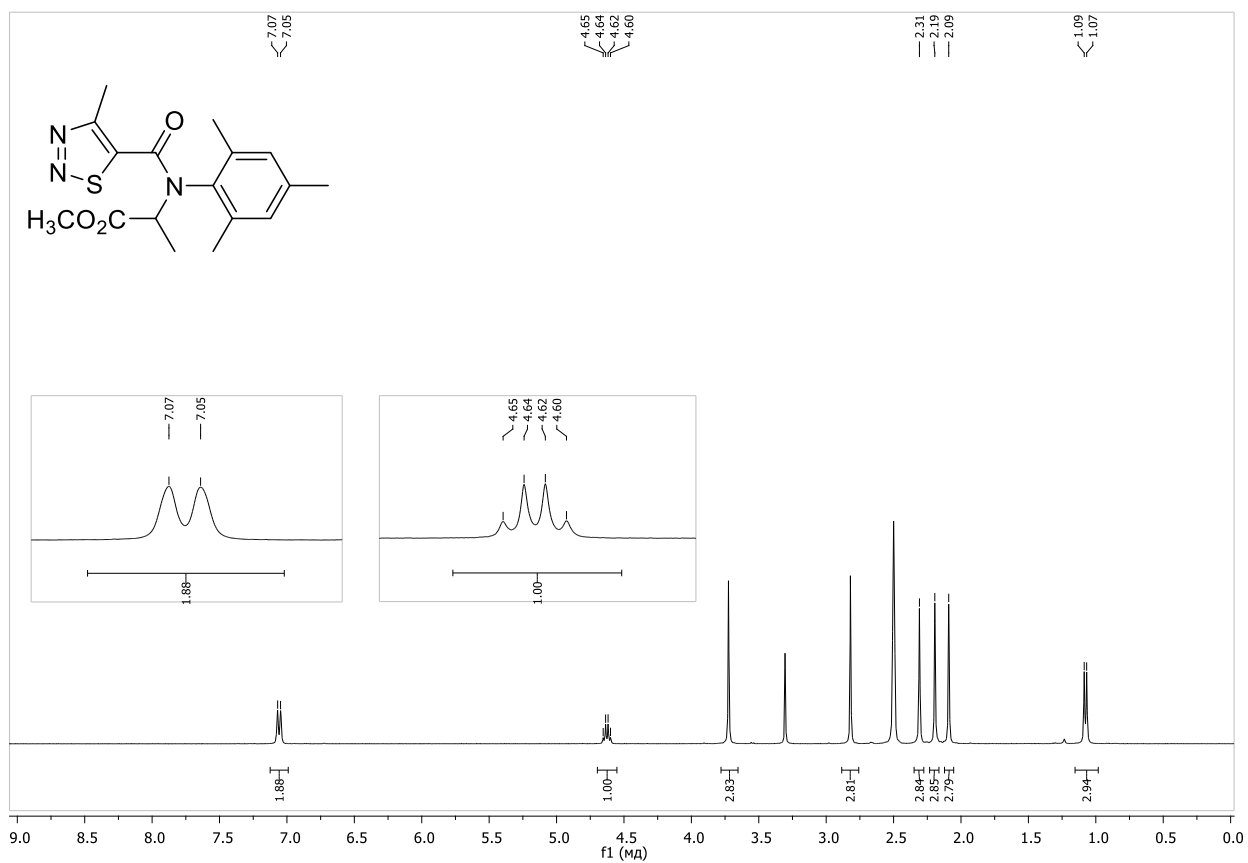

**Figure S11.** <sup>1</sup>H NMR of compound **1e**

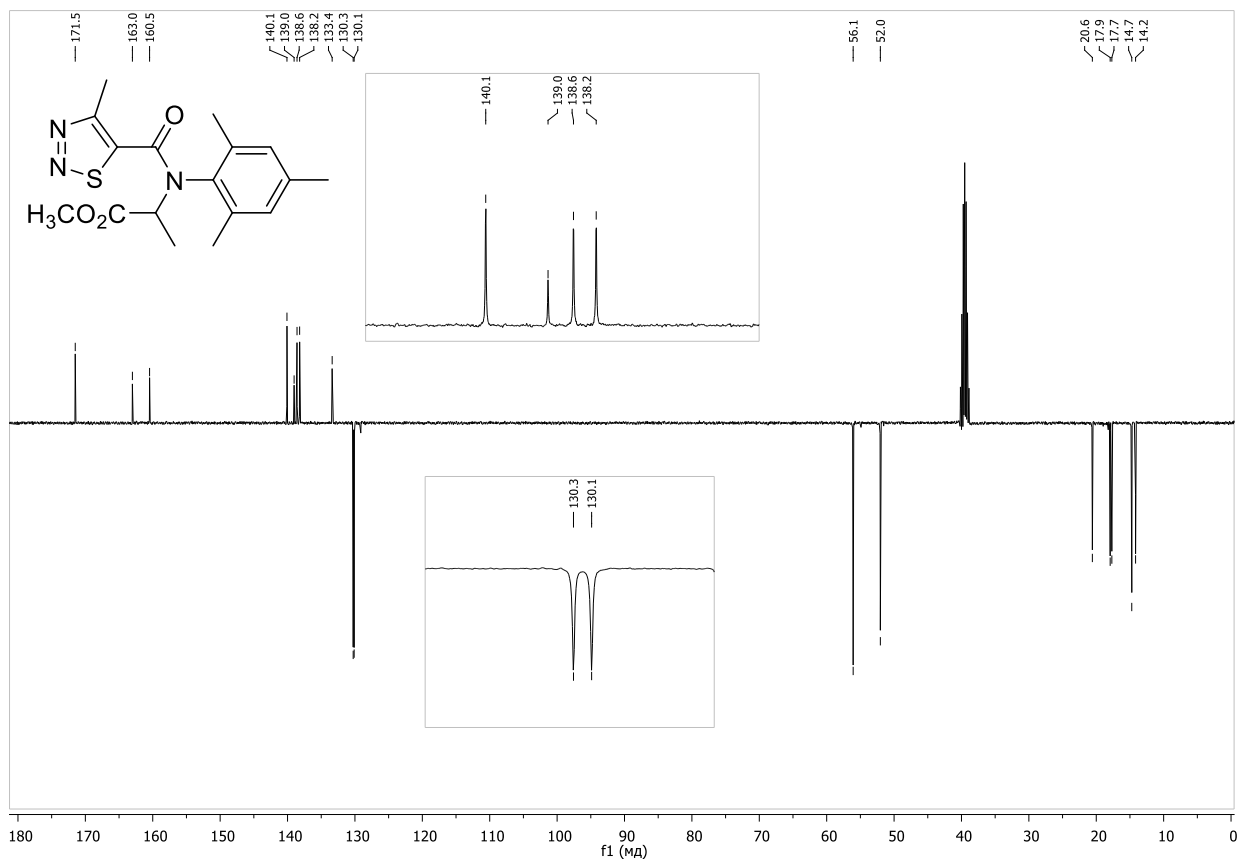

**Figure S12.** <sup>13</sup>C NMR of compound **1e**

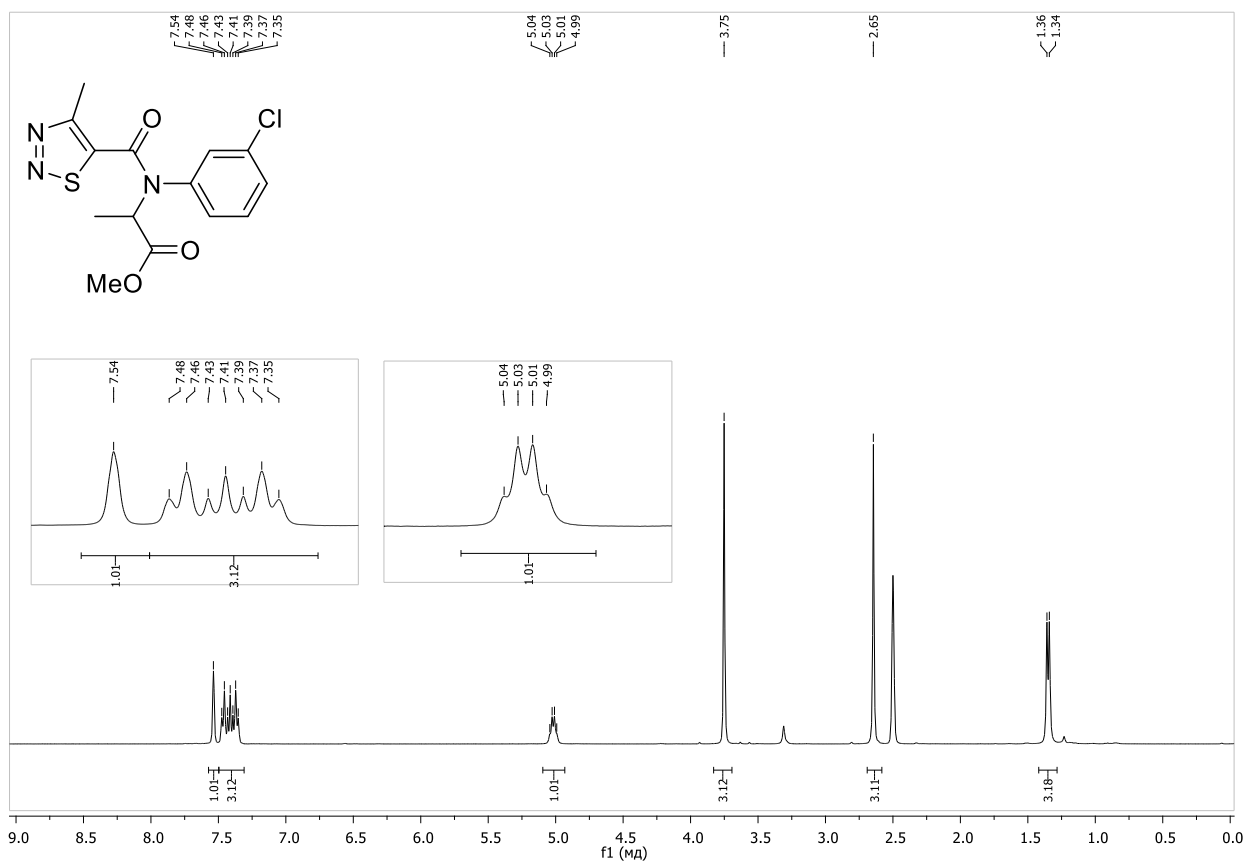

**Figure S13.** <sup>1</sup>H NMR of compound **1f**

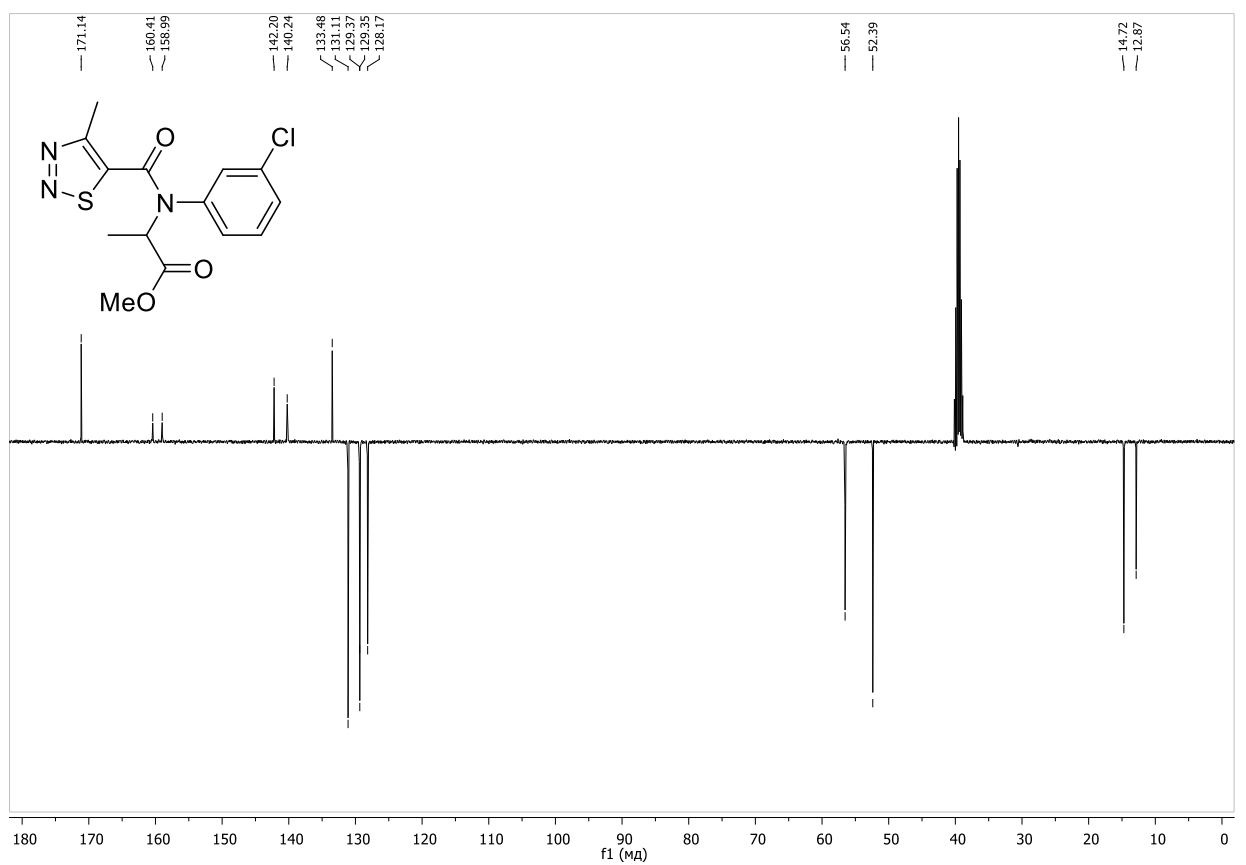

**Figure S14.** <sup>13</sup>C NMR of compound **1f**

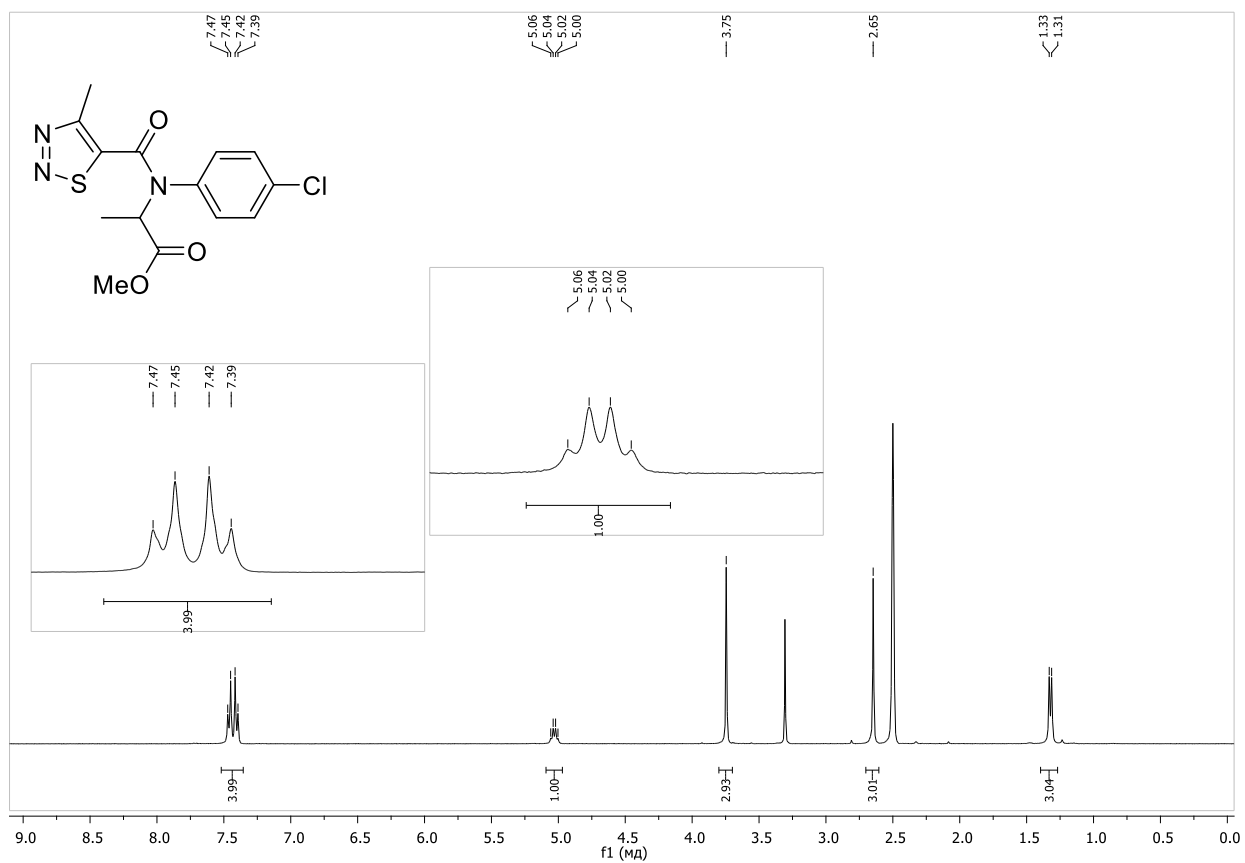

**Figure S15.** <sup>1</sup>H NMR of compound **1g**

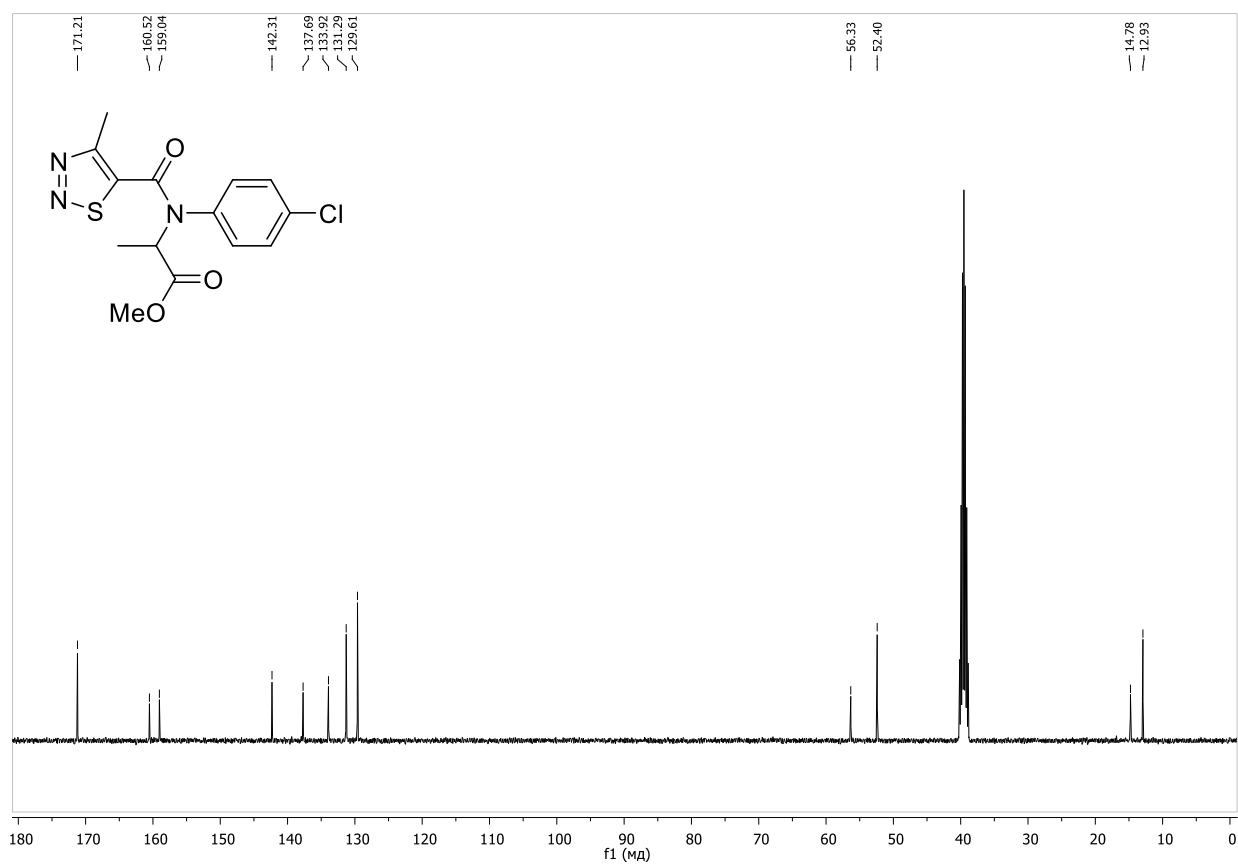

**Figure S16.** <sup>13</sup>C NMR of compound **1f**

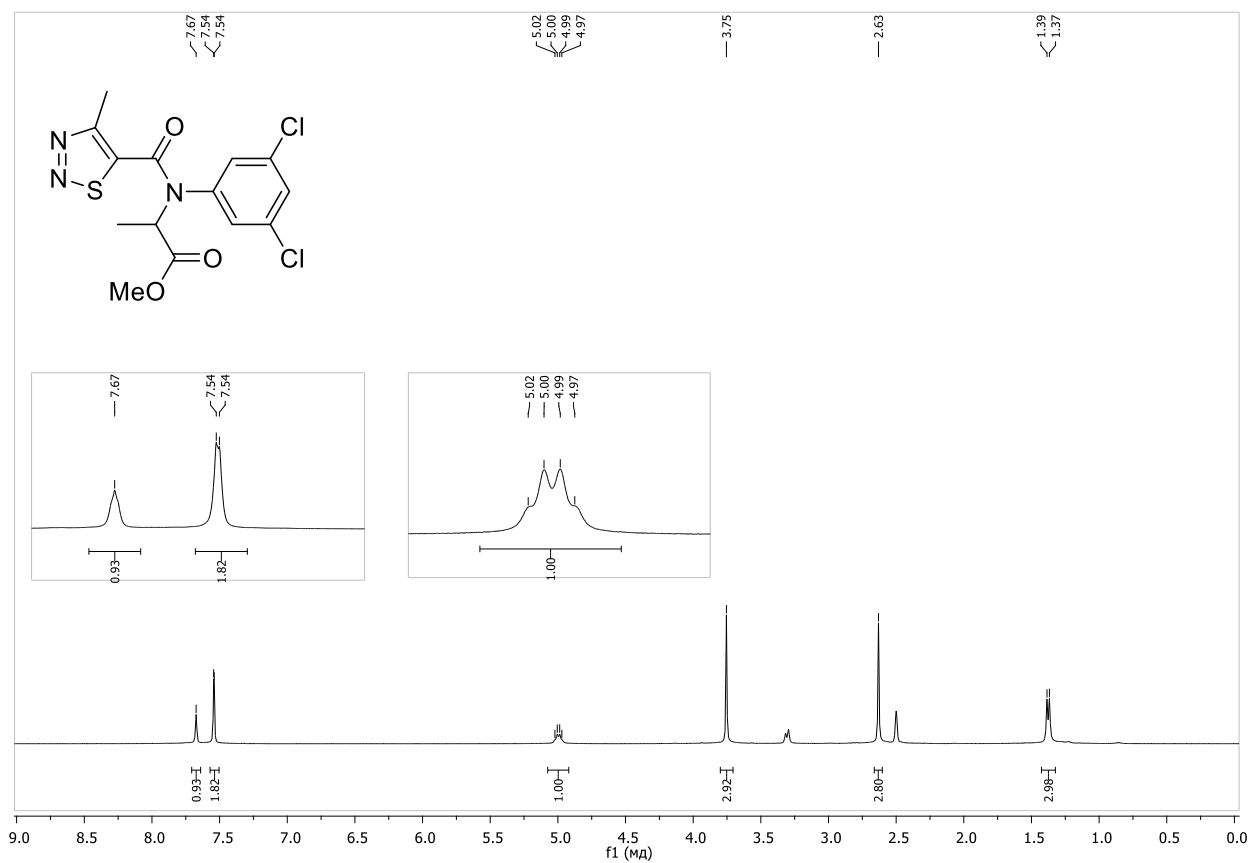

**Figure S17.** <sup>1</sup>H NMR of compound **1h**

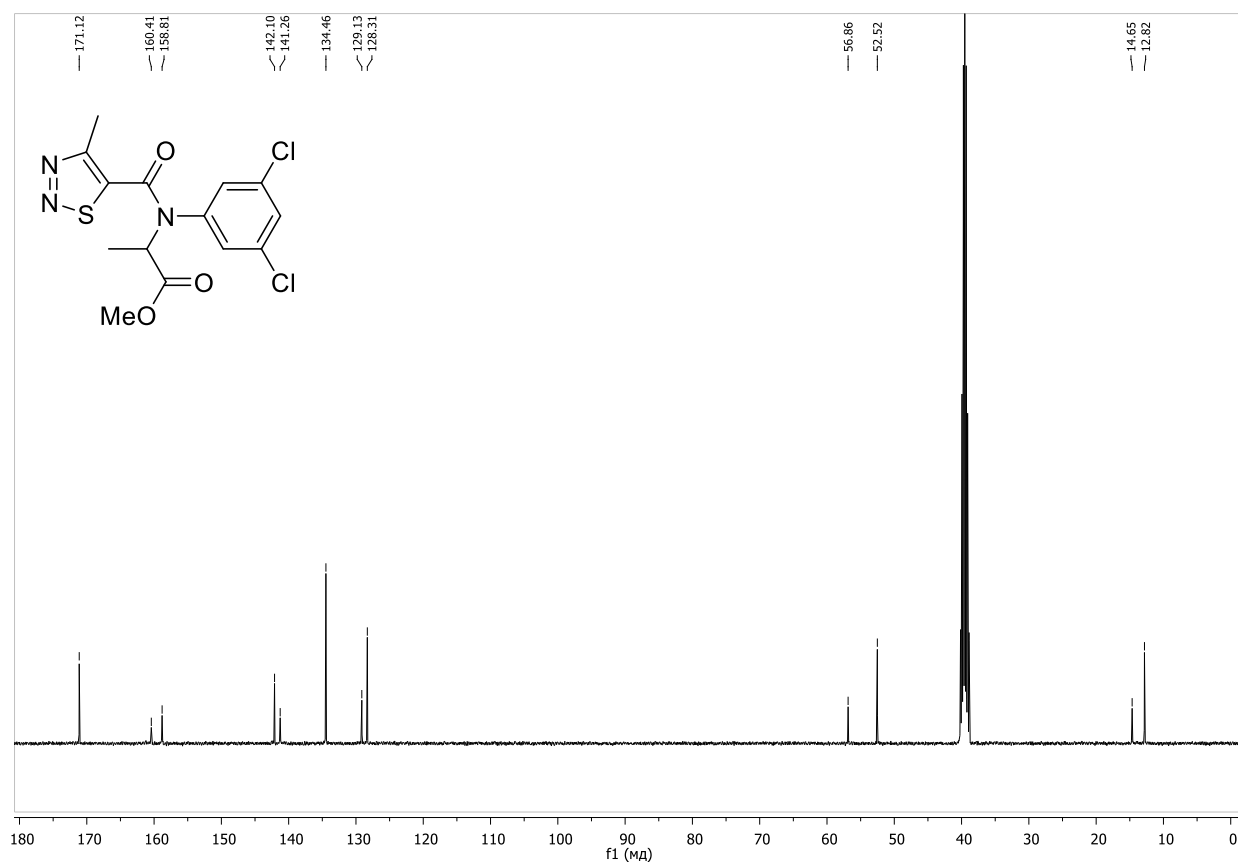

**Figure S18.** <sup>13</sup>C NMR of compound **1h**

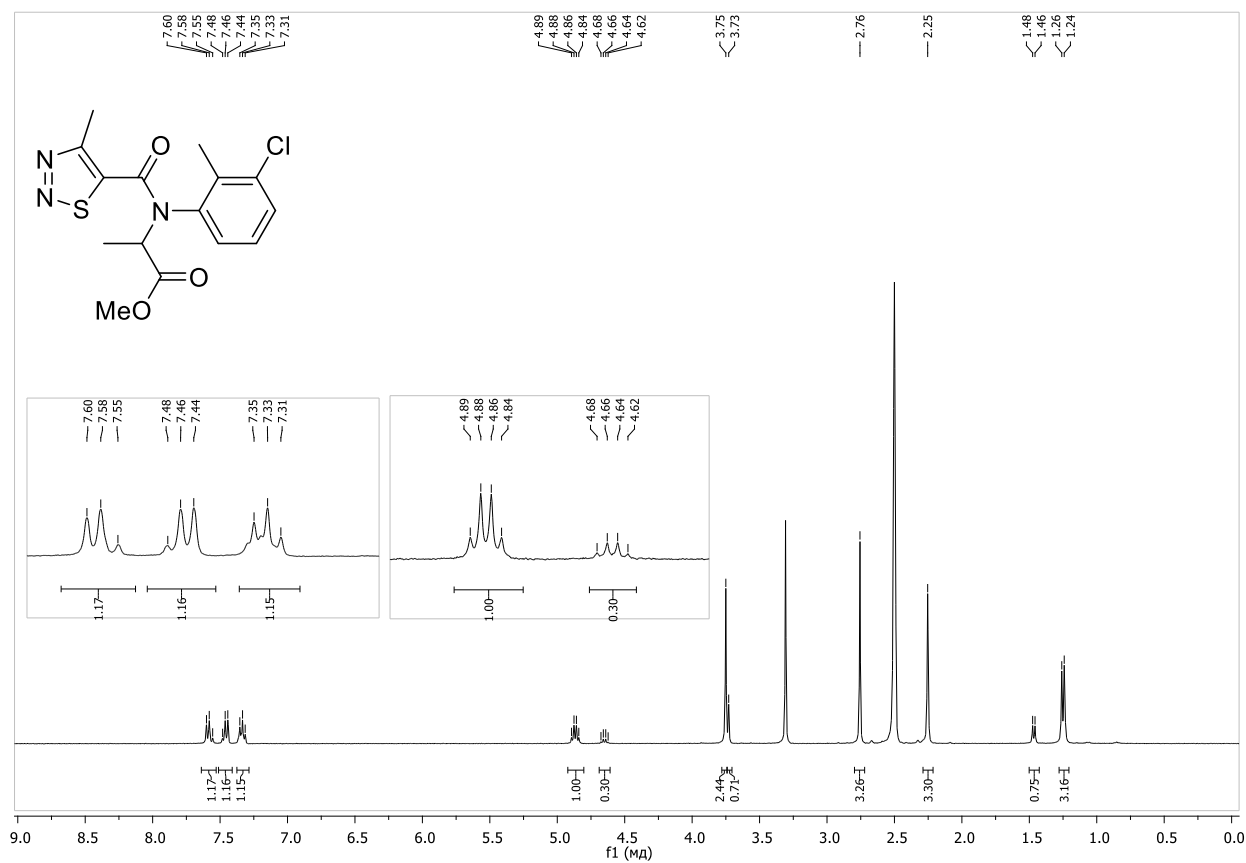

Figure S19. <sup>1</sup>H NMR of compound **1i**

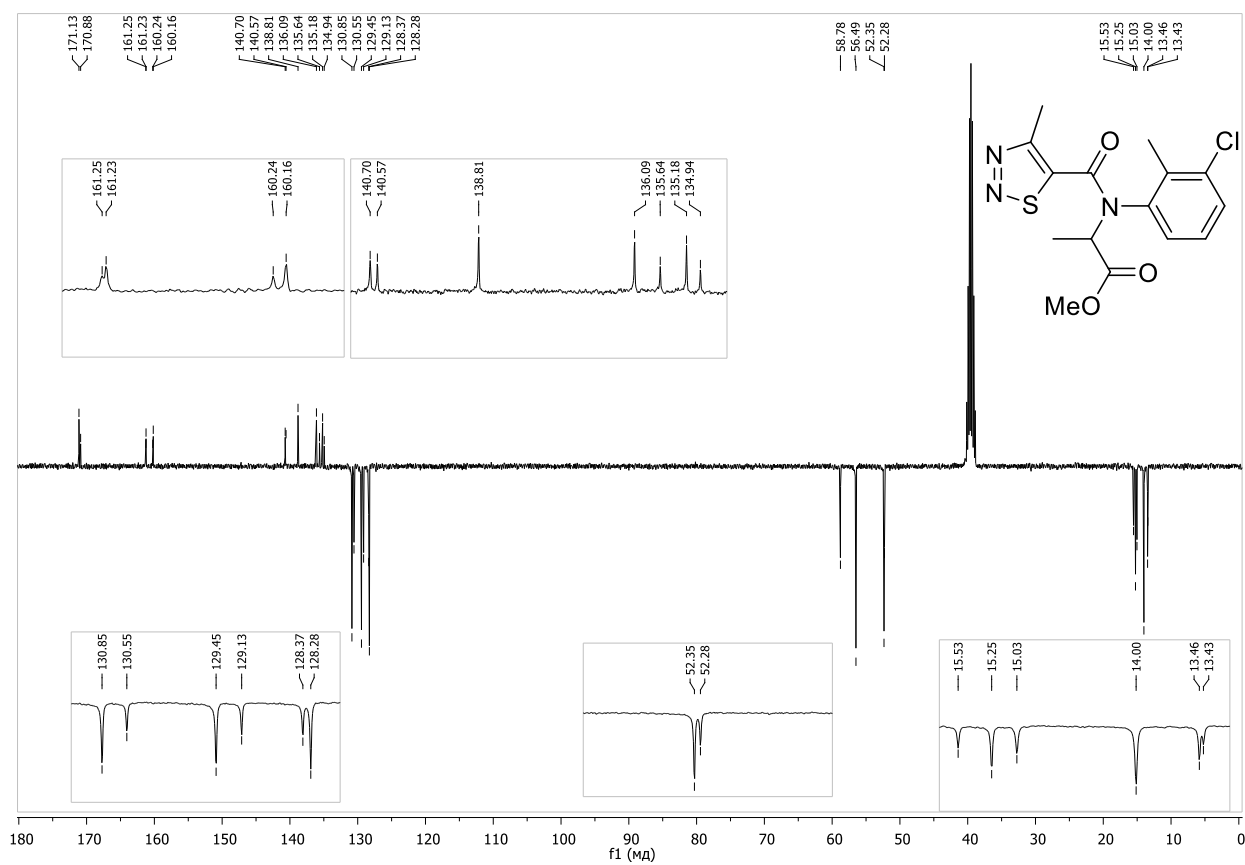

Figure S20. <sup>13</sup>C NMR of compound **1i**

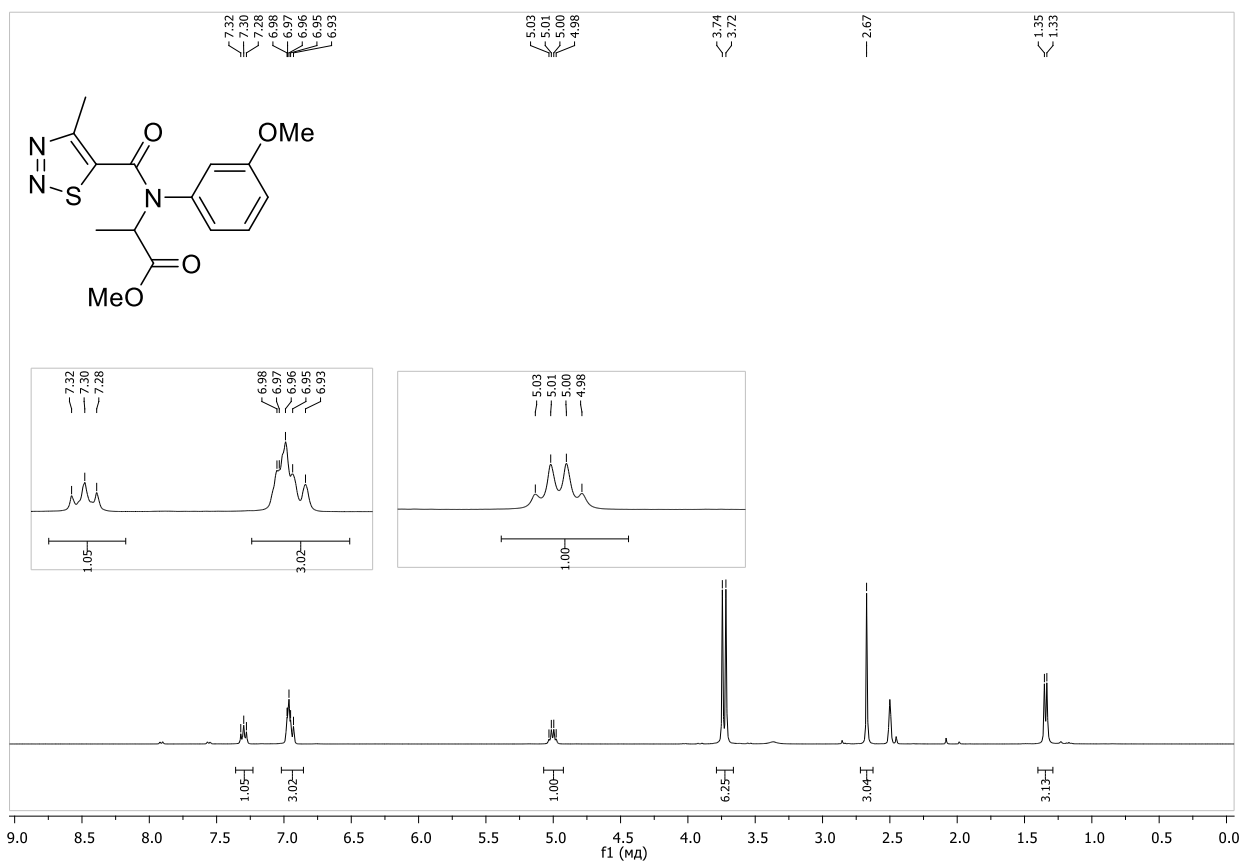

**Figure S21.** <sup>1</sup>H NMR of compound **1j**

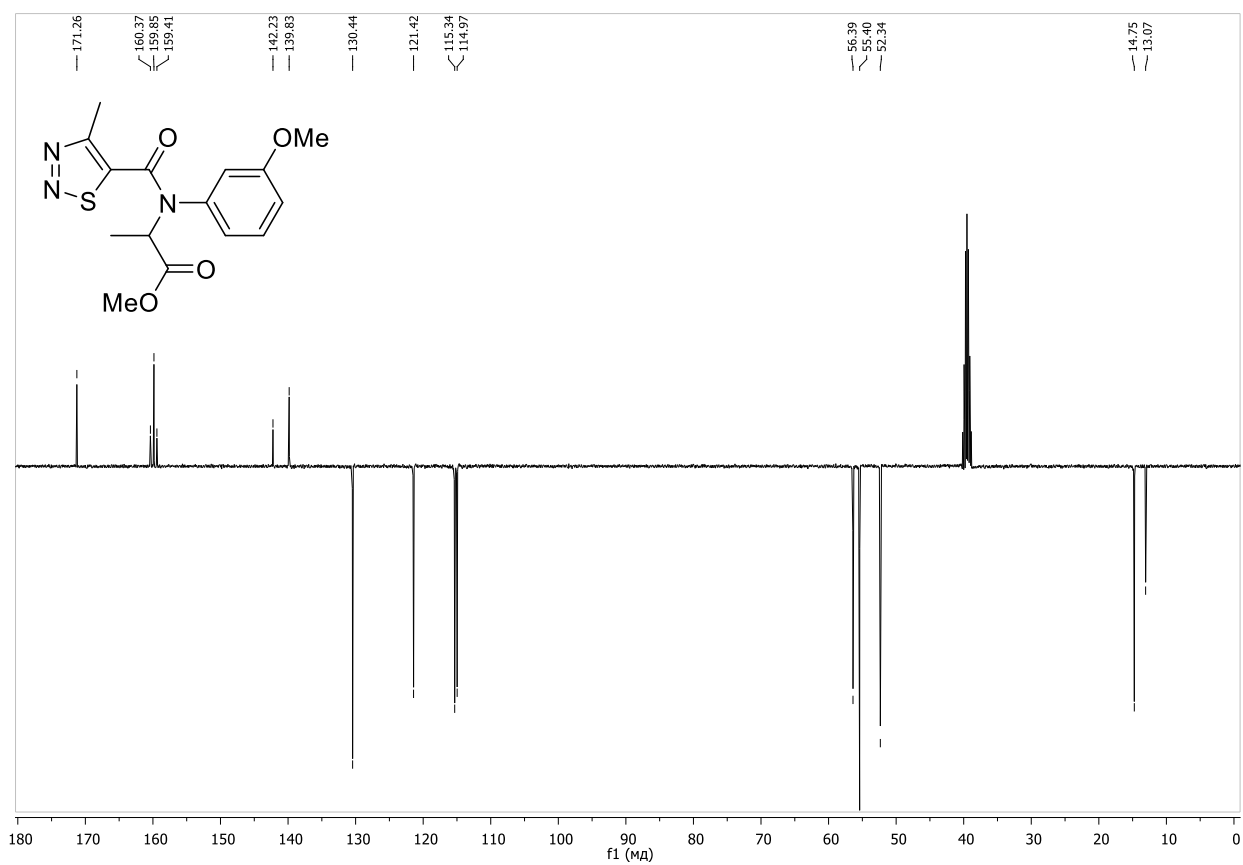

**Figure S22.** <sup>13</sup>C NMR of compound **1j**

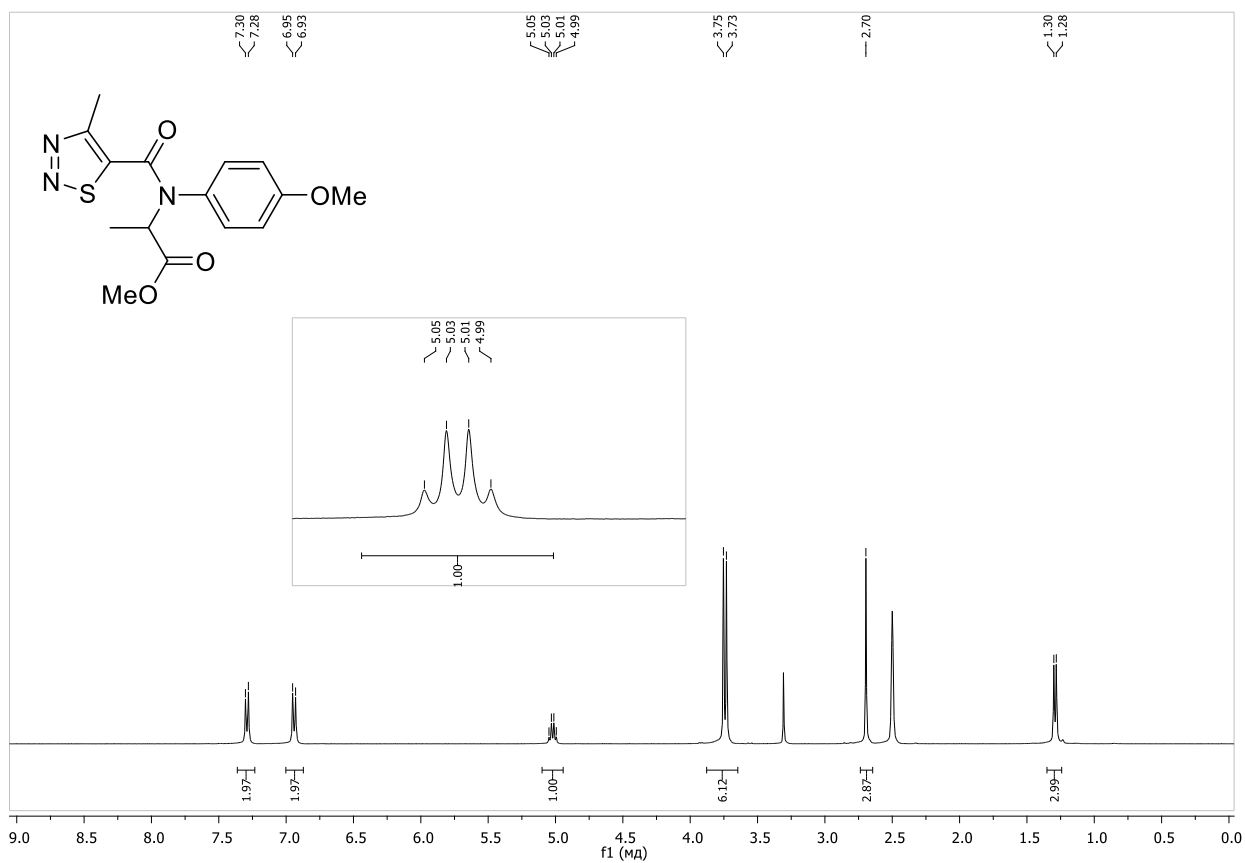

**Figure S23.** <sup>1</sup>H NMR of compound **1k**

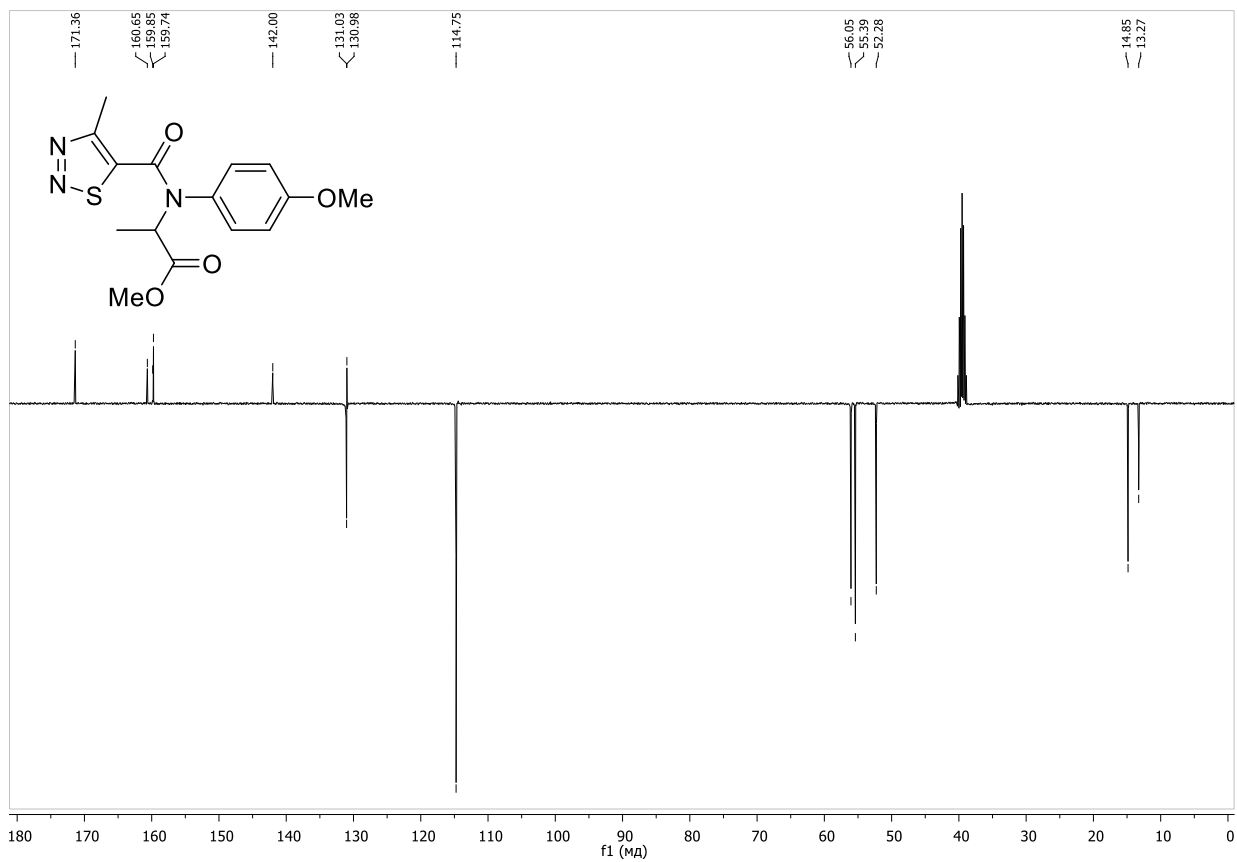

**Figure S24.** <sup>13</sup>C NMR of compound **1k**

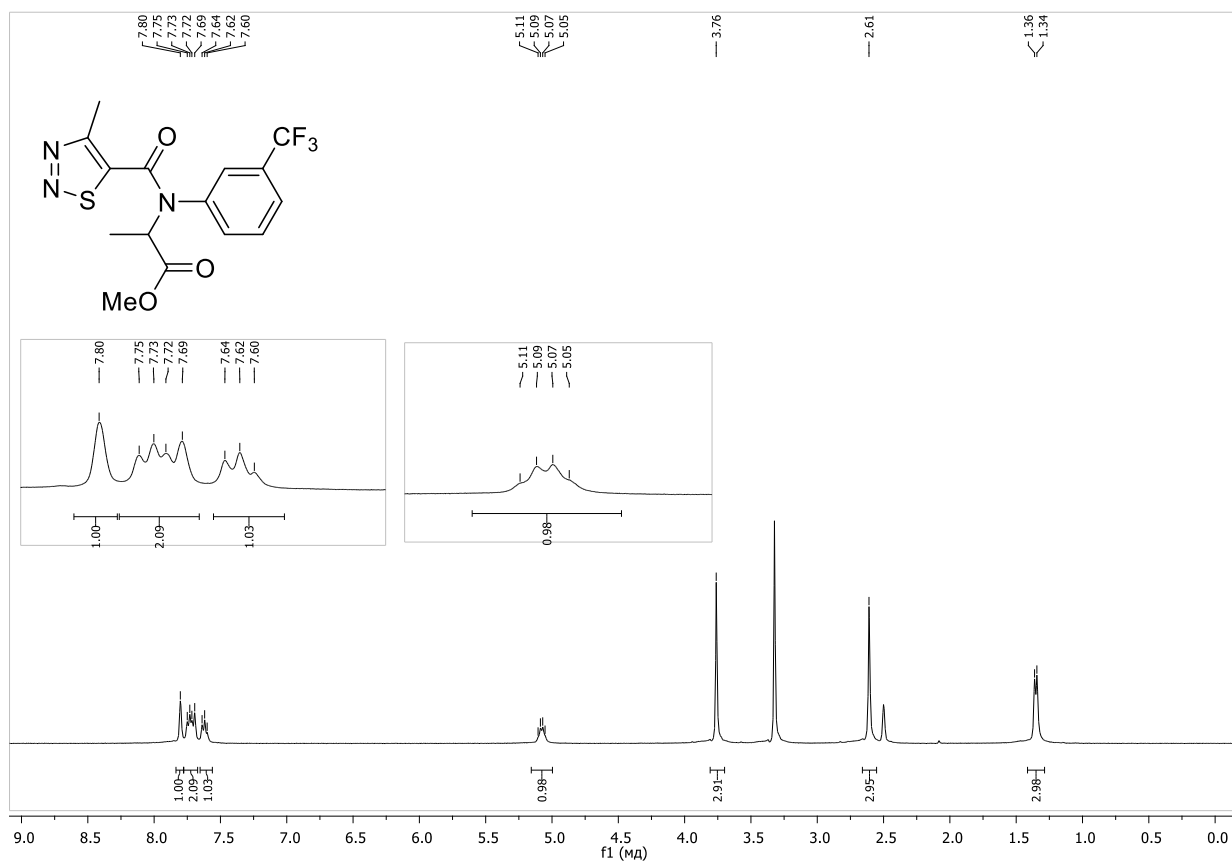

**Figure S25.** <sup>1</sup>H NMR of compound **11**

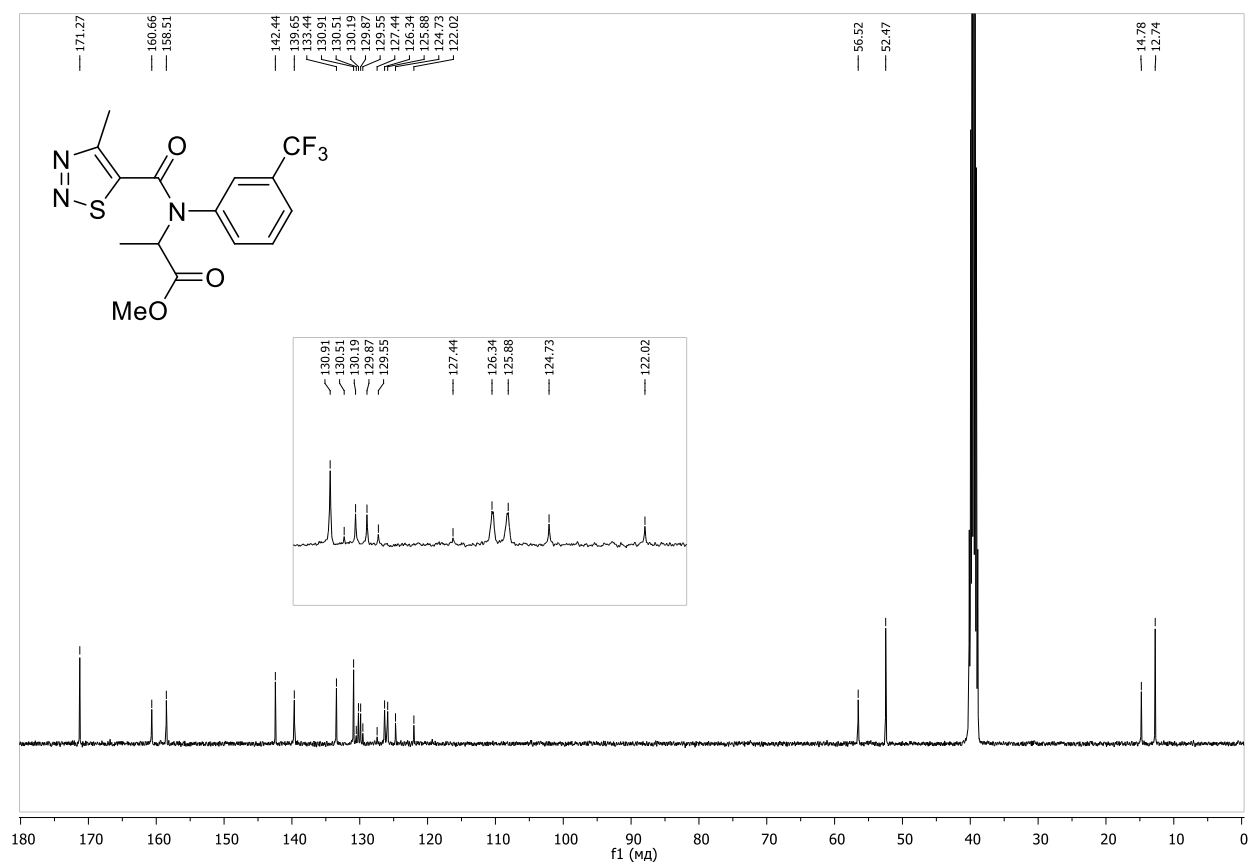

**Figure S26.** <sup>13</sup>C NMR of compound **11**

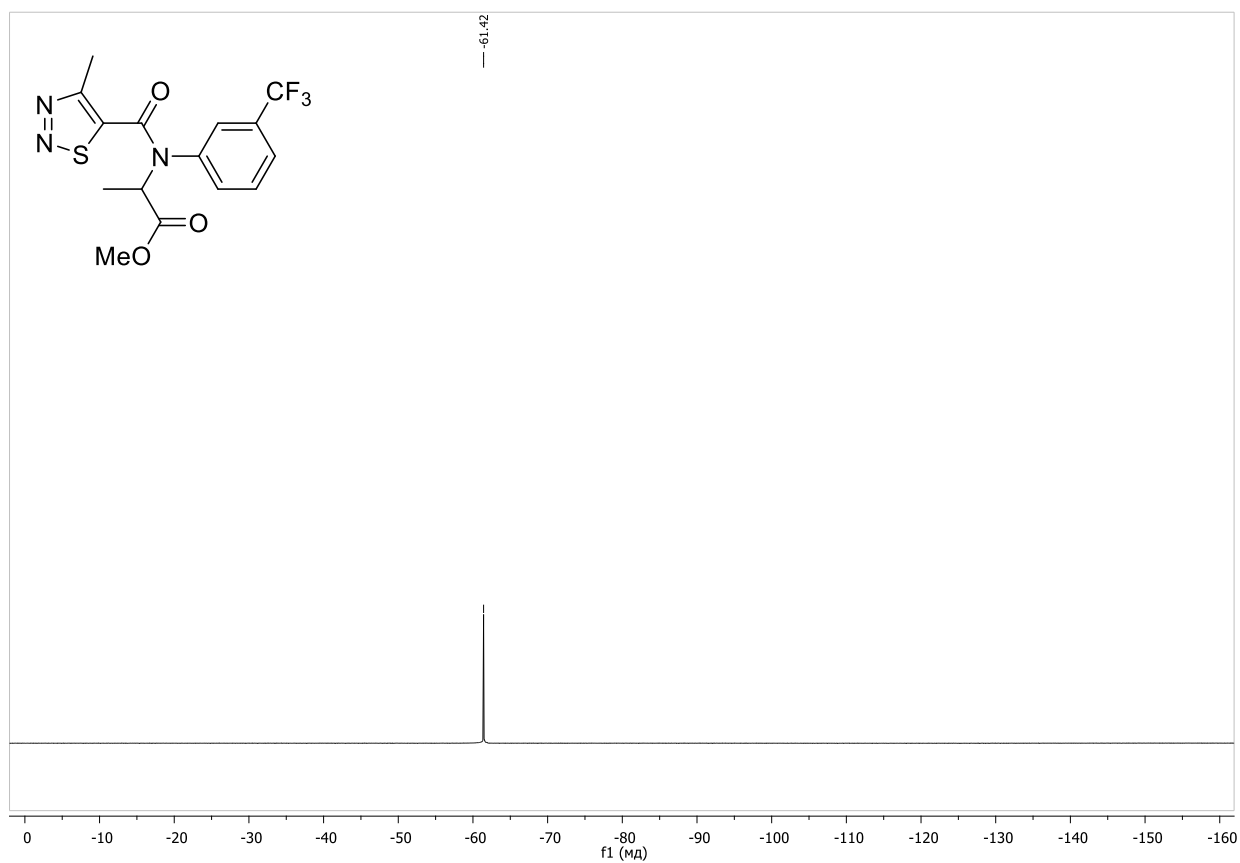

**Figure S27.**  $^{19}\text{F}$  NMR of compound **11**

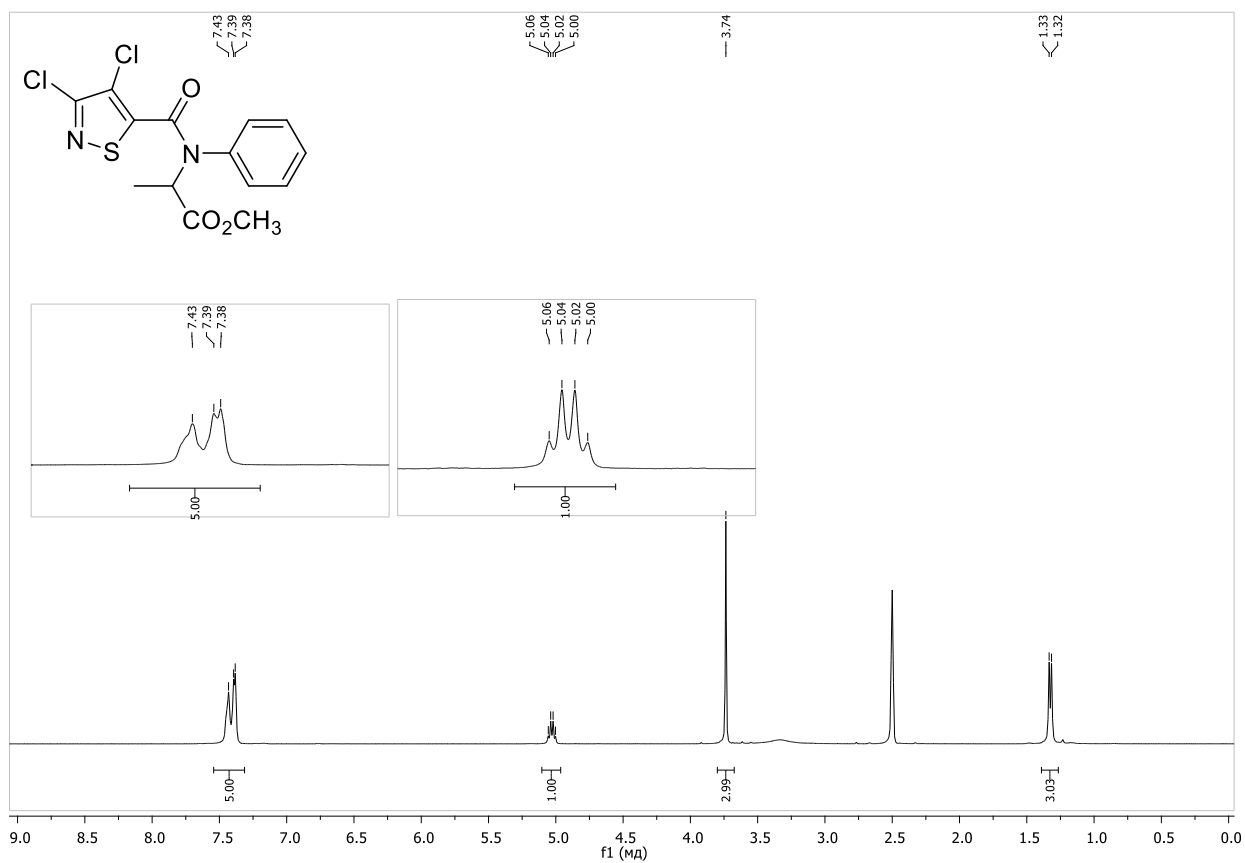

Figure S28. <sup>1</sup>H NMR of compound 2a

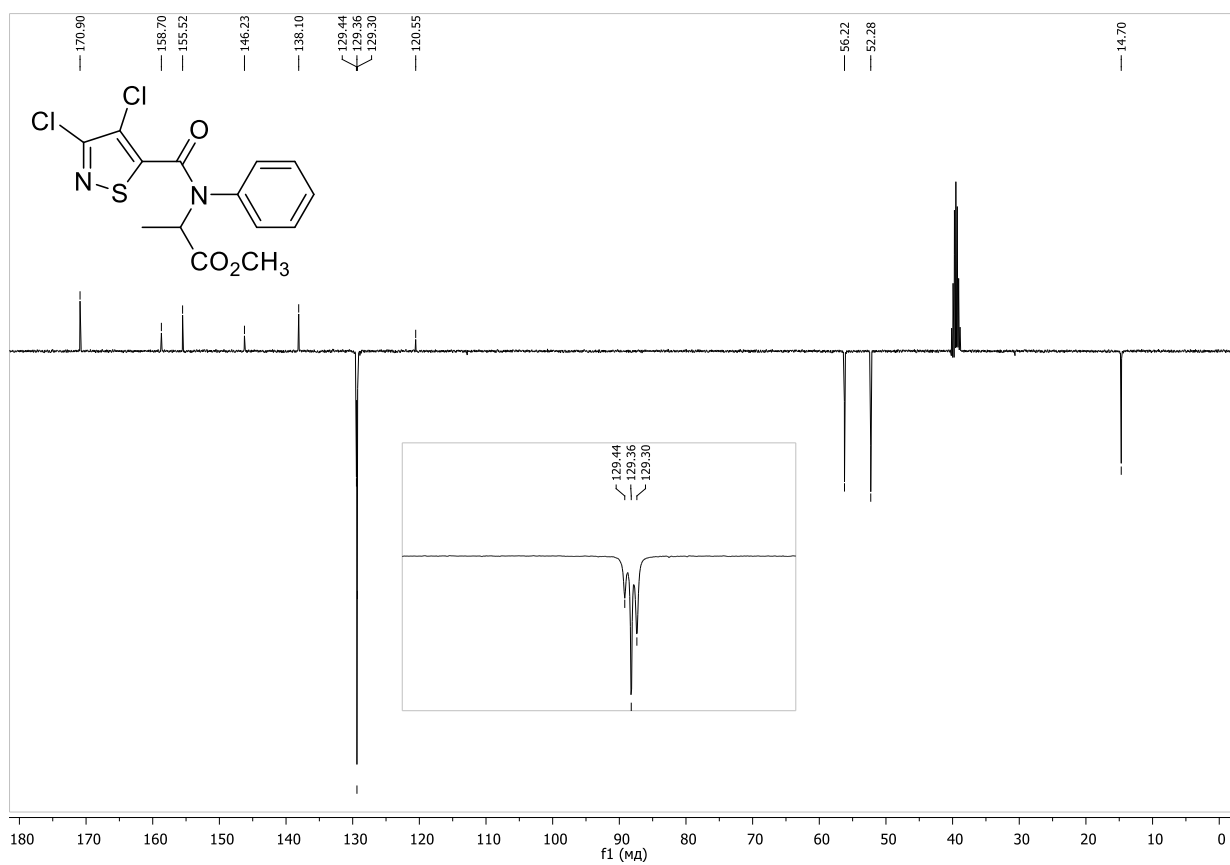

Figure S29. <sup>13</sup>C NMR of compound 2a

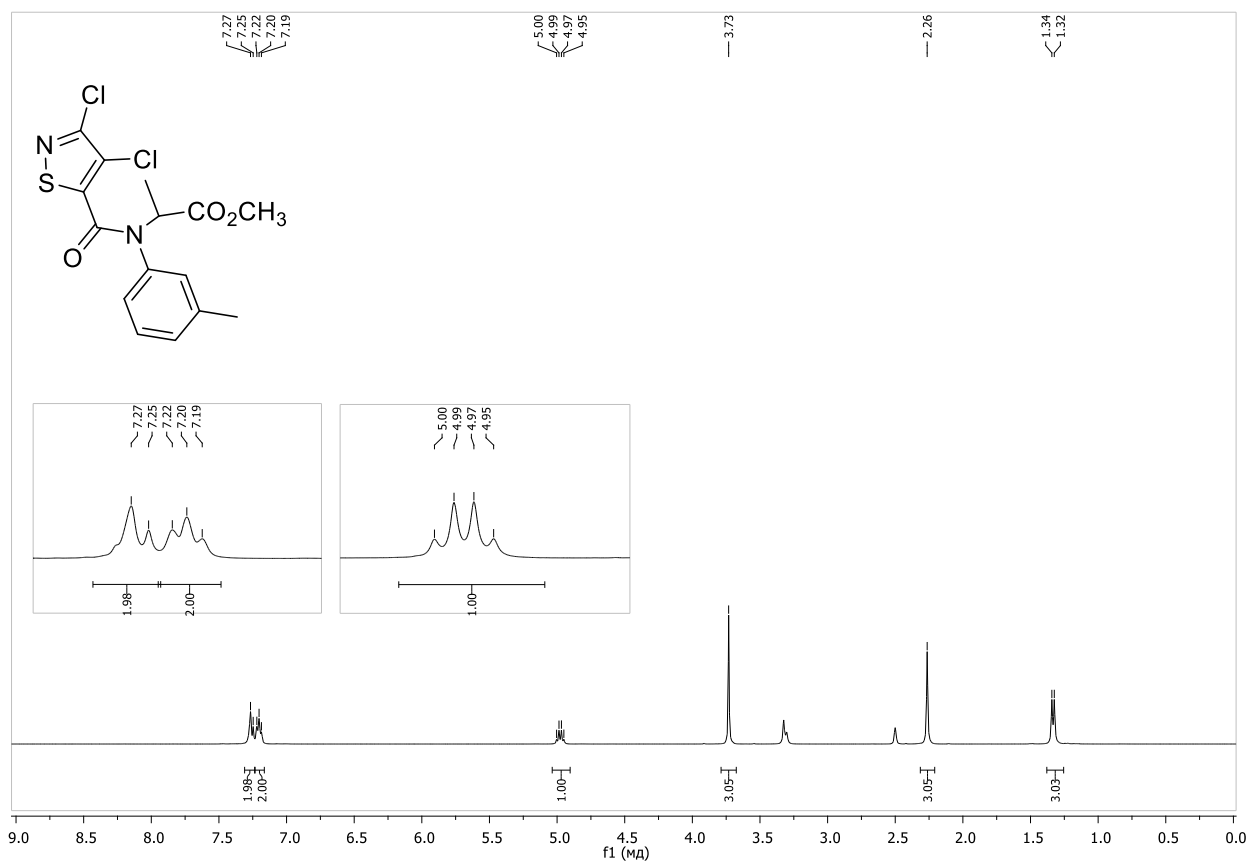

**Figure S30.** <sup>1</sup>H NMR of compound **2b**

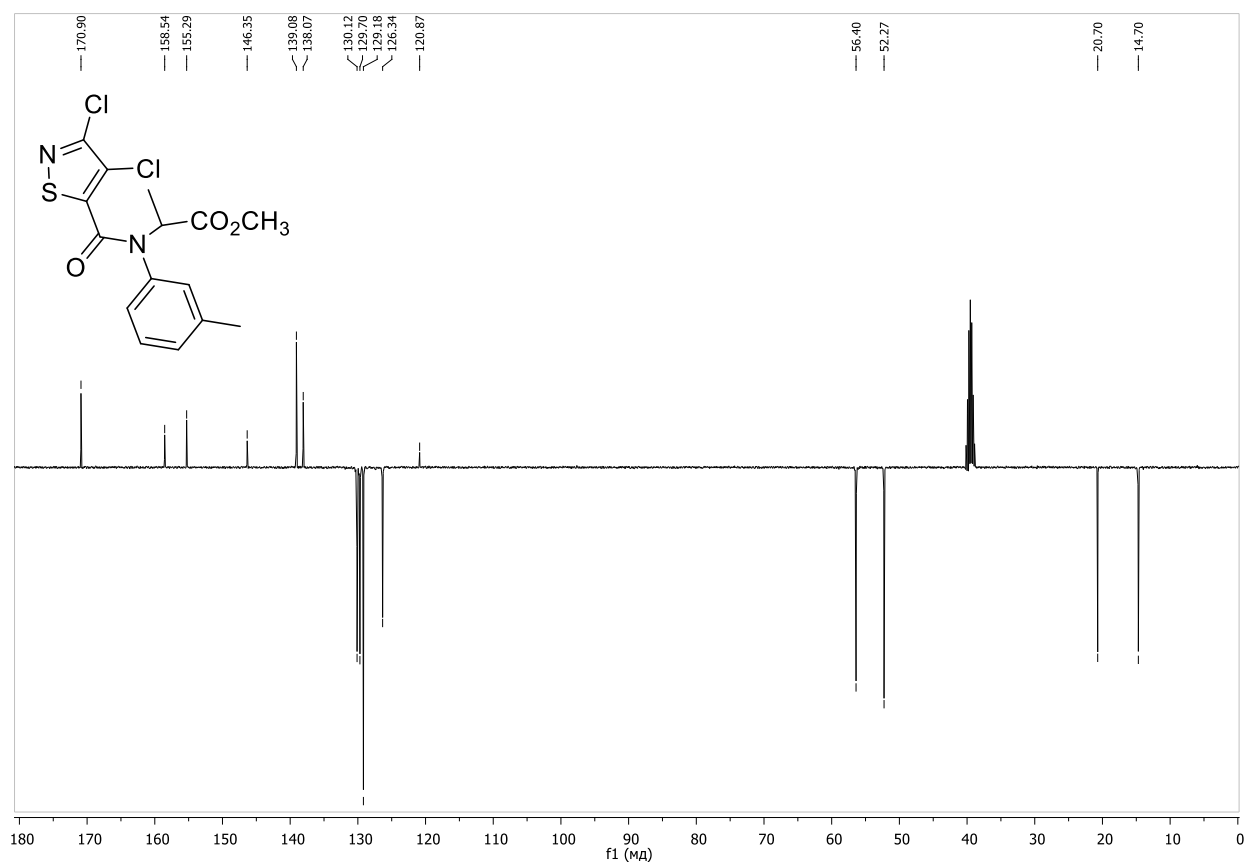

**Figure S31.** <sup>13</sup>C NMR of compound **2b**

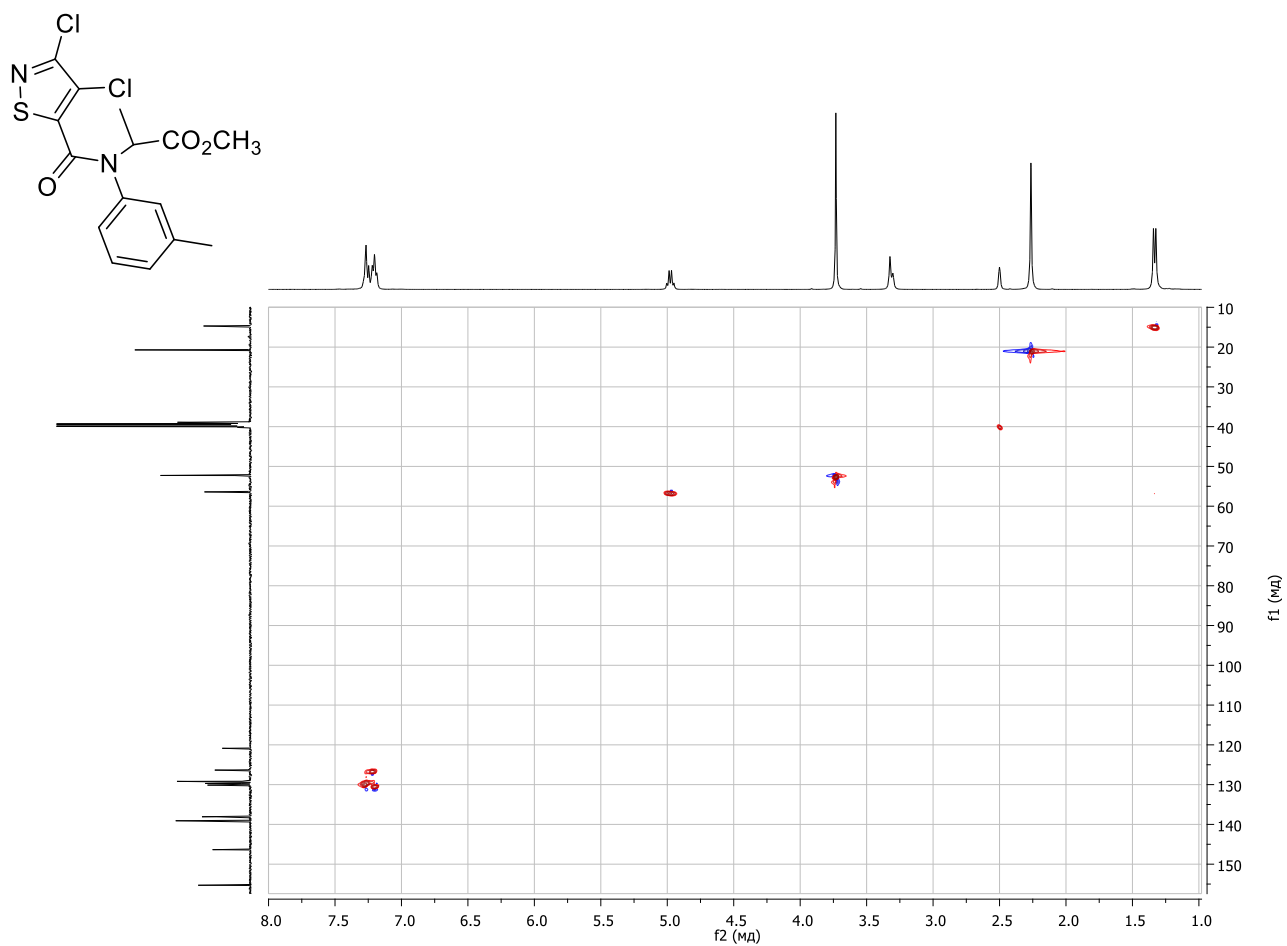

**Figure S32.** The HSQC  $^1\text{H}$ - $^{13}\text{C}$  NMR spectrum of **2b**

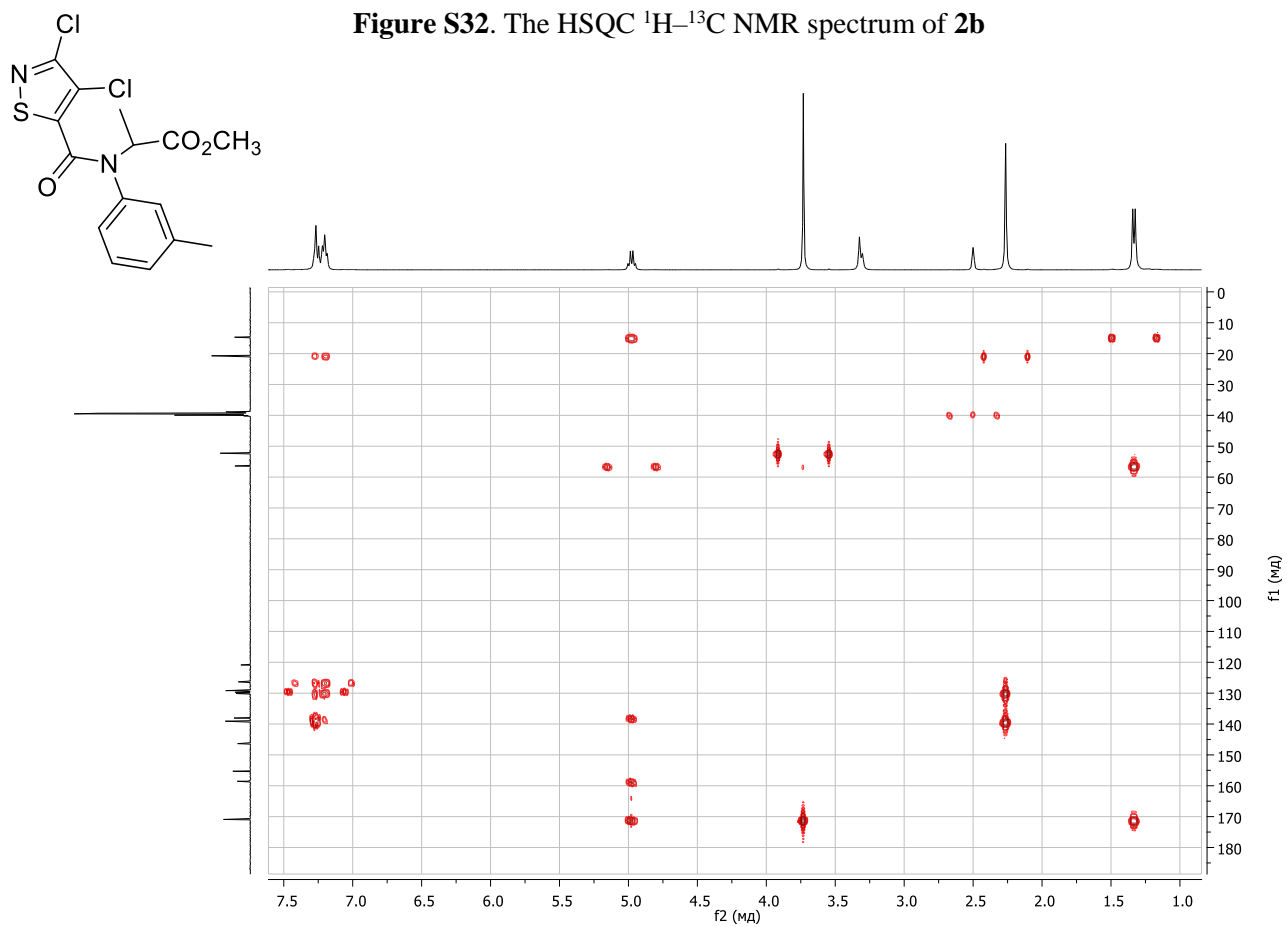

**Figure S33.** The HMBC  $^1\text{H}$ - $^{13}\text{C}$  NMR spectrum of **2b**

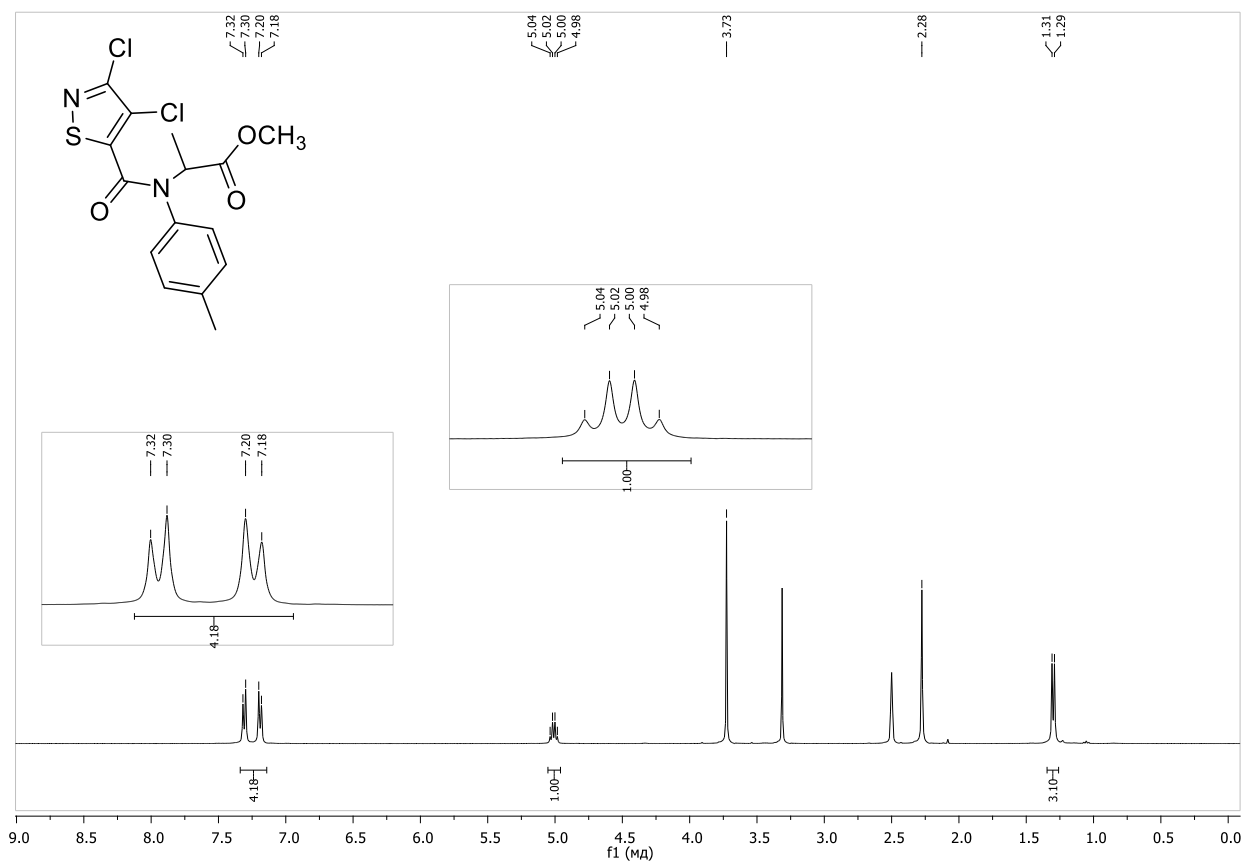

**Figure S34.**  $^1\text{H}$  NMR of compound **2c**

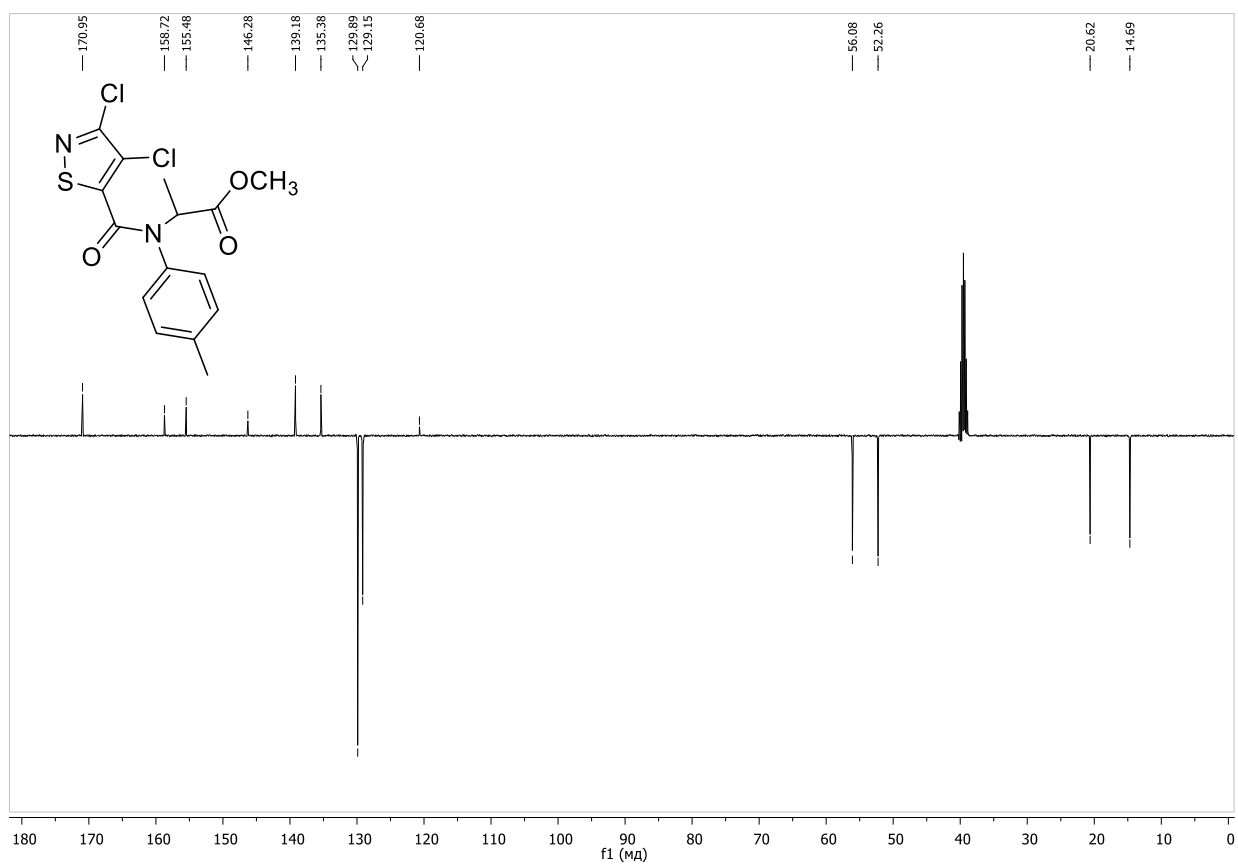

**Figure S35.**  $^{13}\text{C}$  NMR of compound **2c**

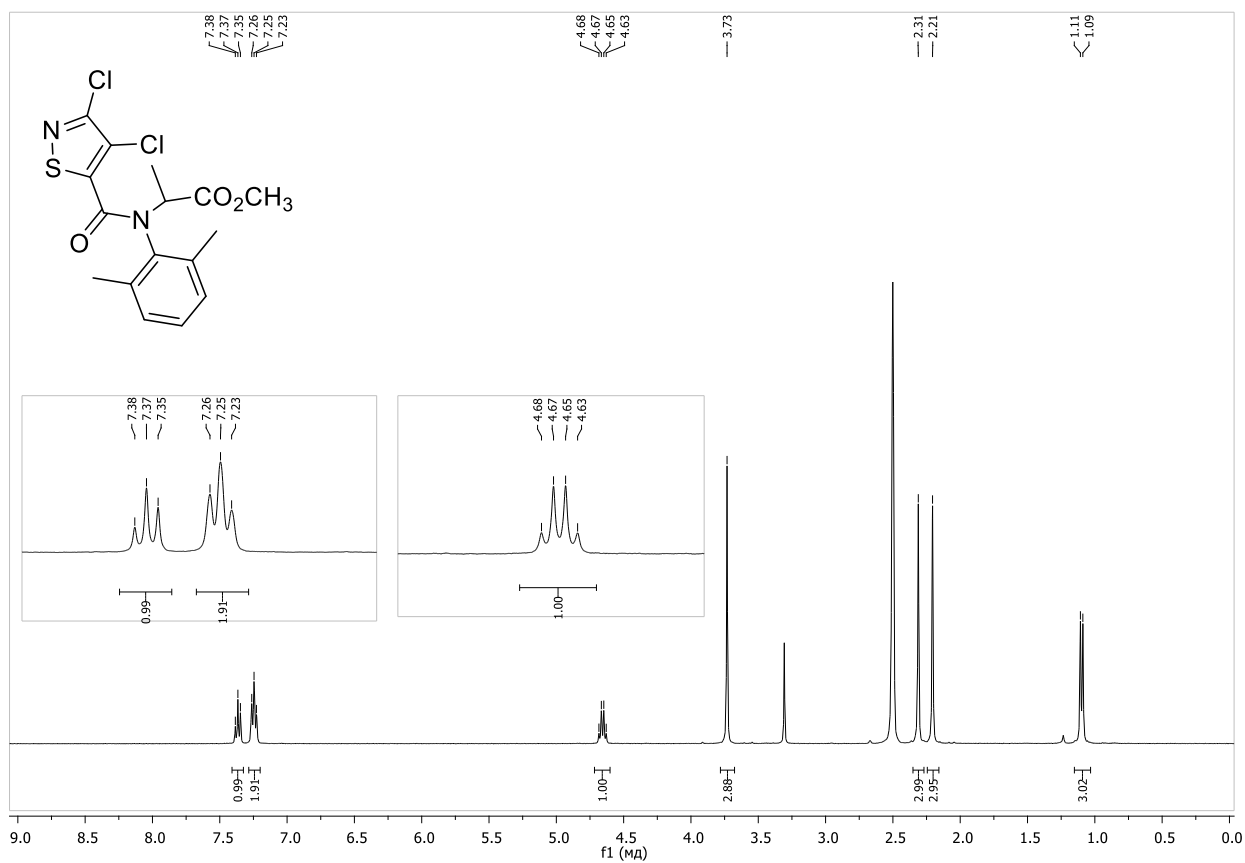

**Figure S36.** <sup>1</sup>H NMR of compound **2d**

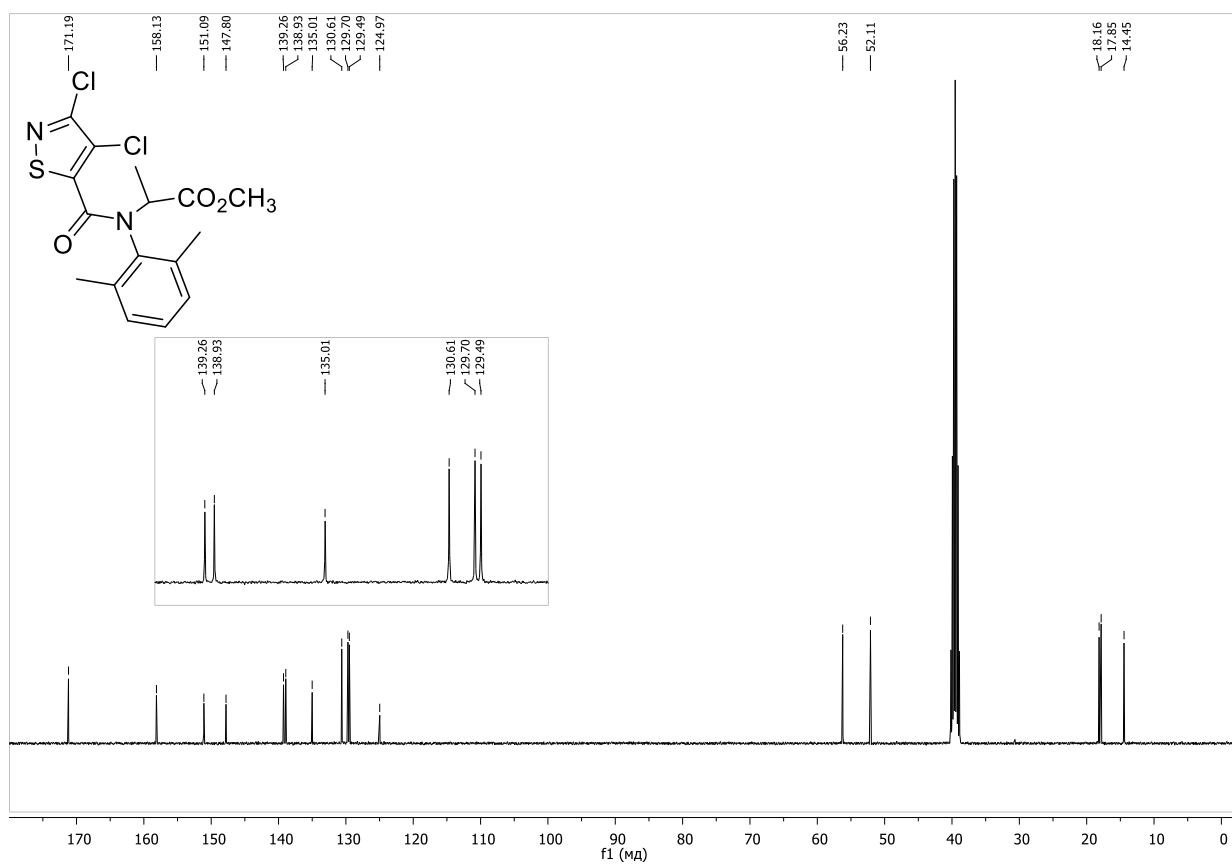

**Figure S37.** <sup>13</sup>C NMR of compound **2d**

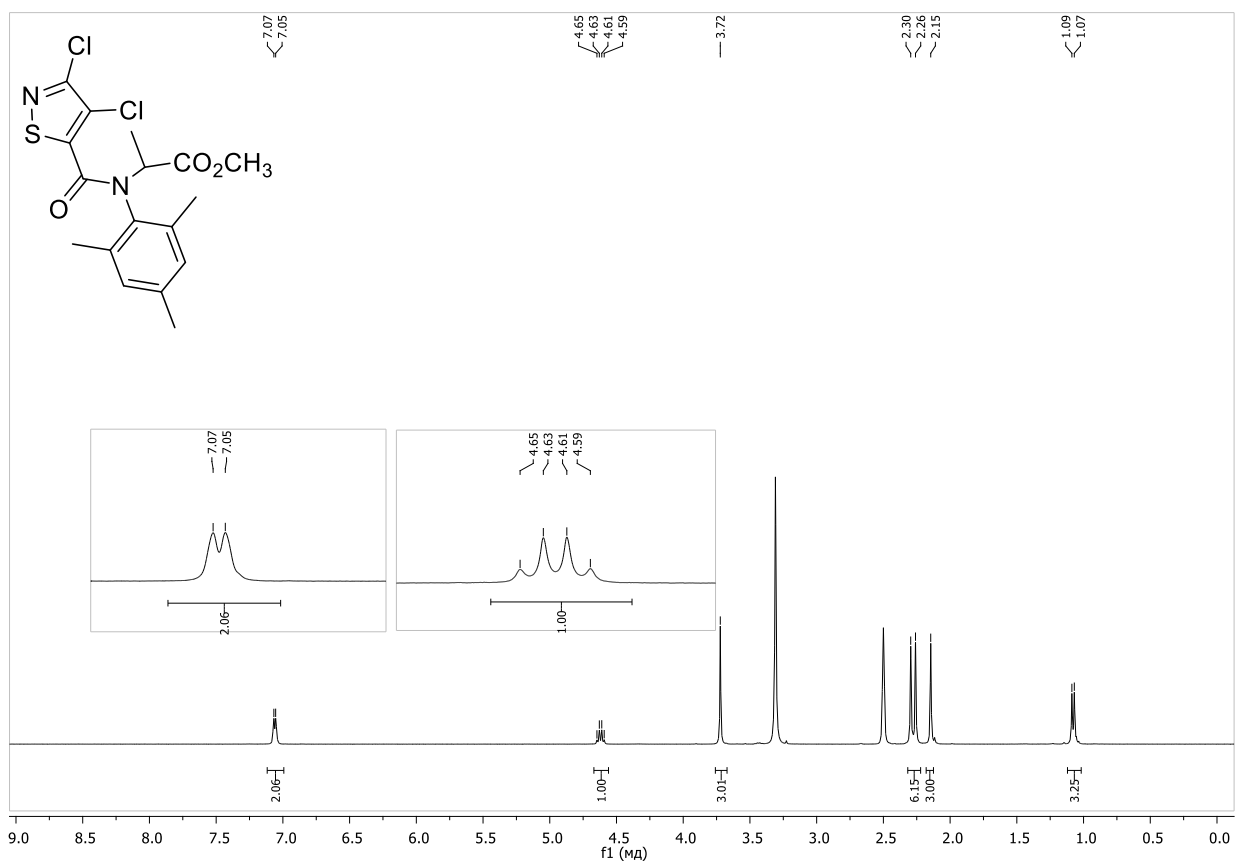

Figure S38. <sup>1</sup>H NMR of compound 2e

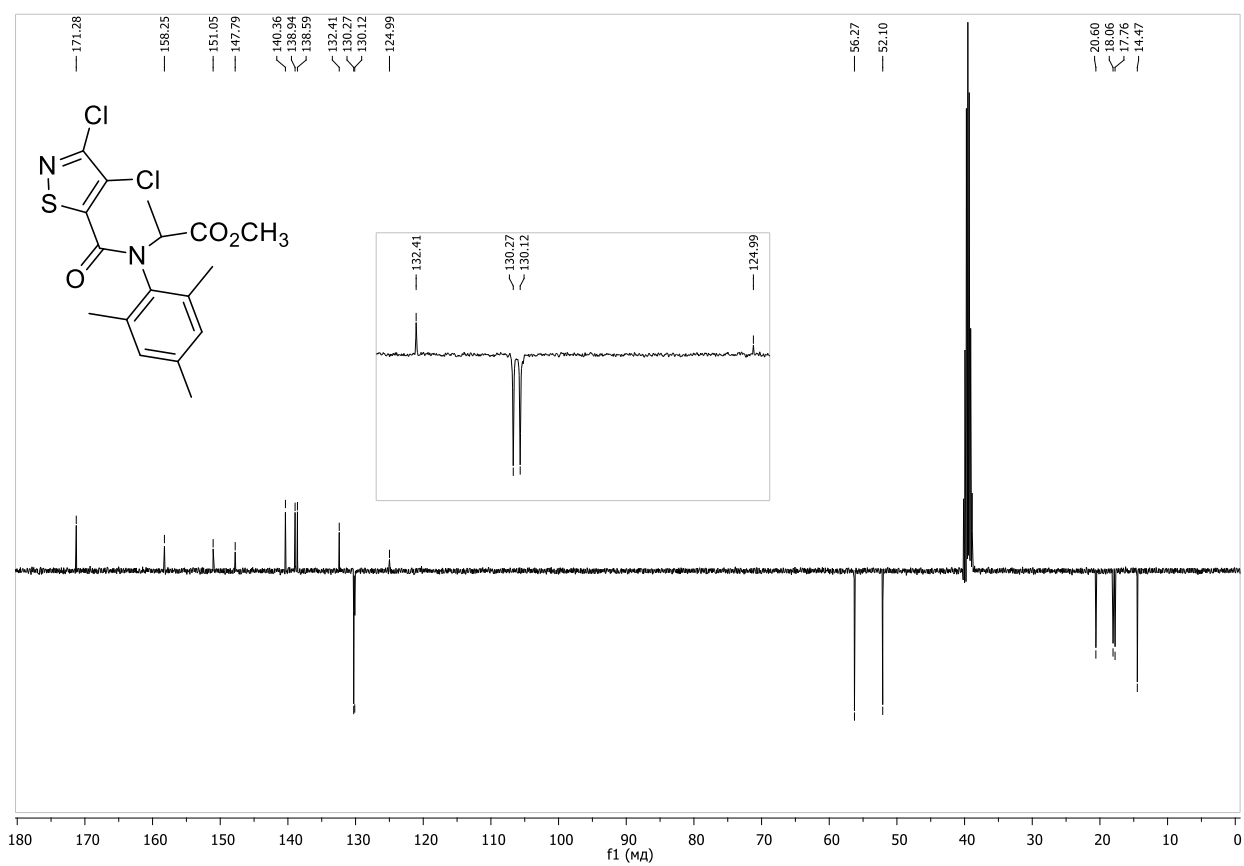

Figure S39. <sup>13</sup>C NMR of compound 2e

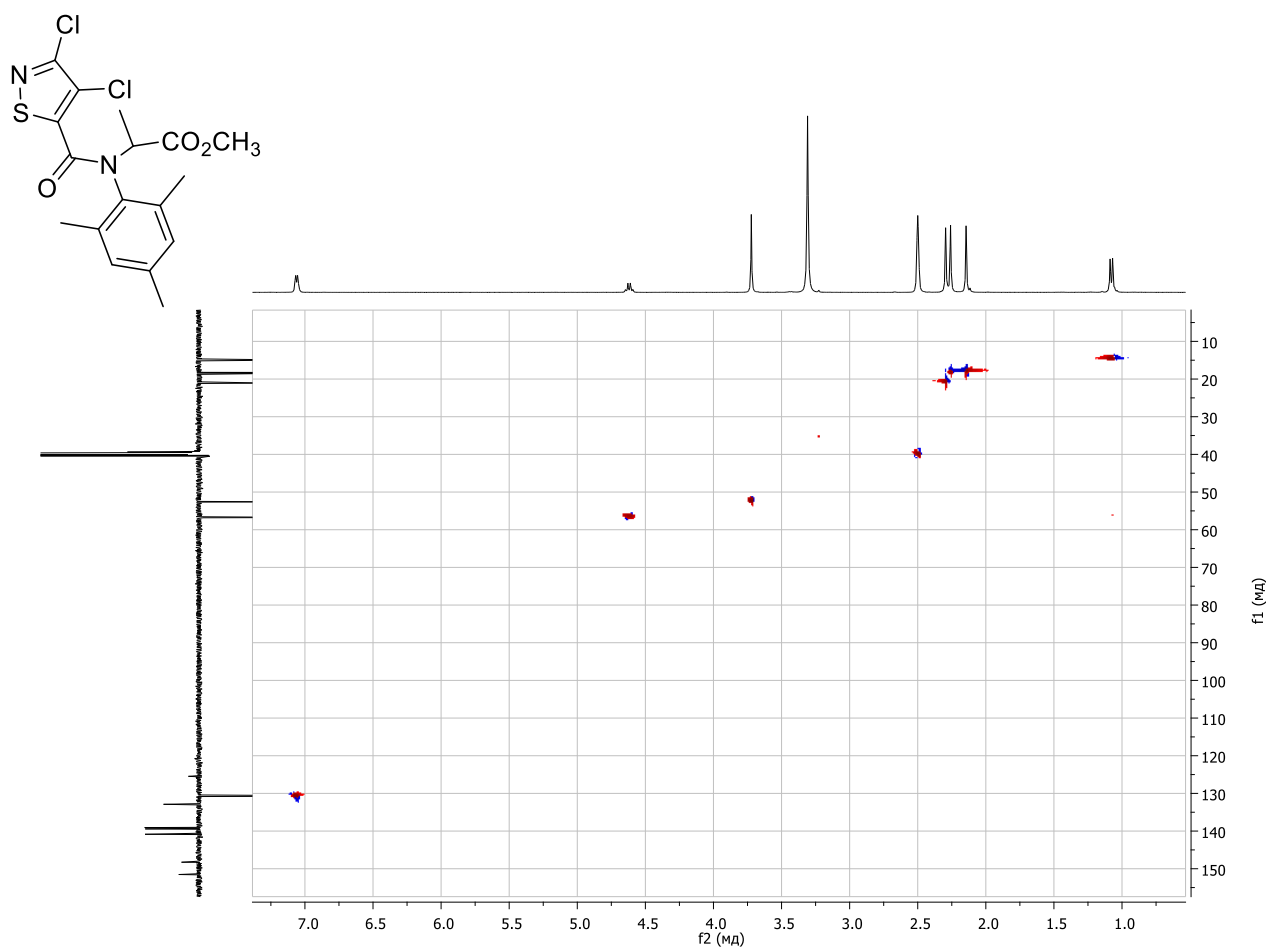

**Figure S40.** The HSQC  $^1\text{H}$ - $^{13}\text{C}$  NMR spectrum of **2e**

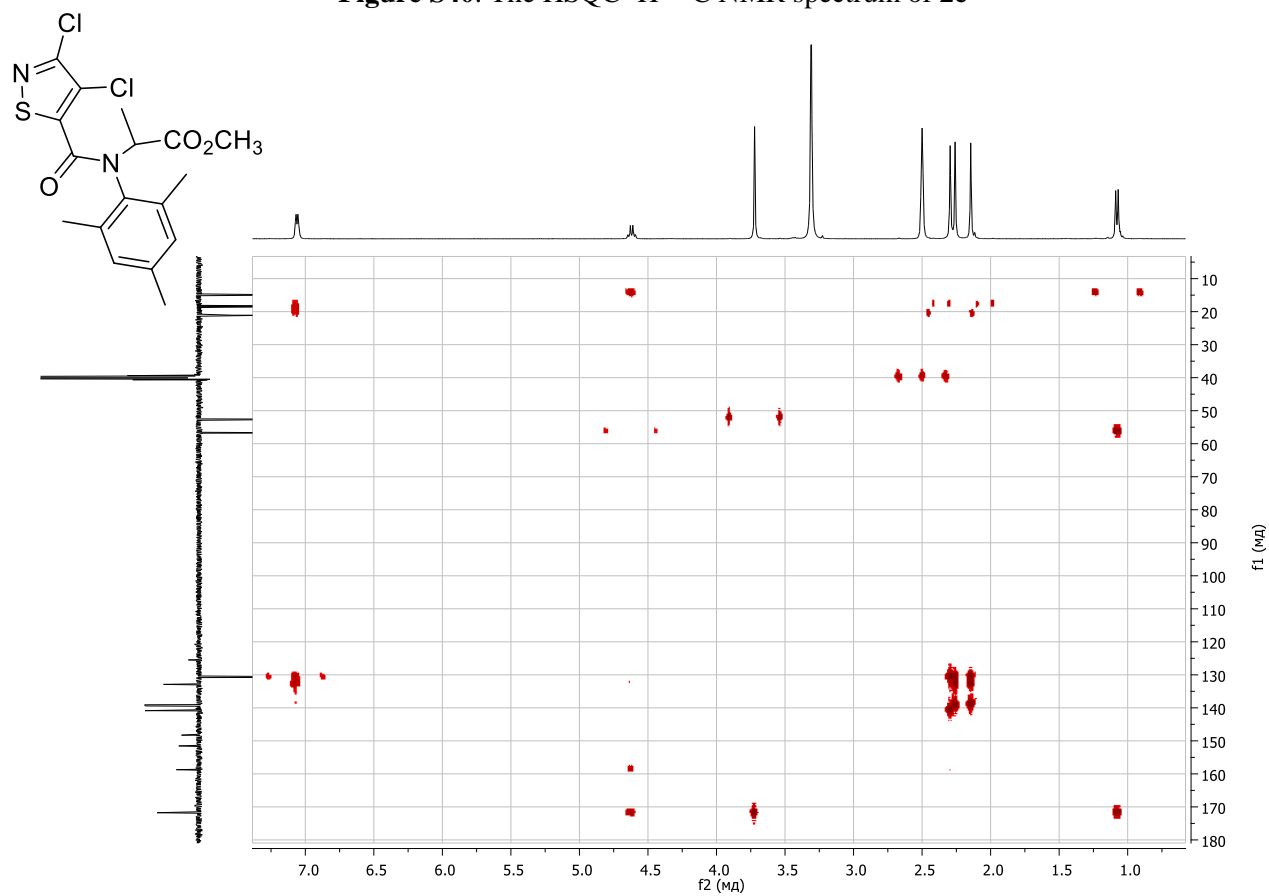

**Figure S41.** The HMBC  $^1\text{H}$ - $^{13}\text{C}$  NMR spectrum of **2e**

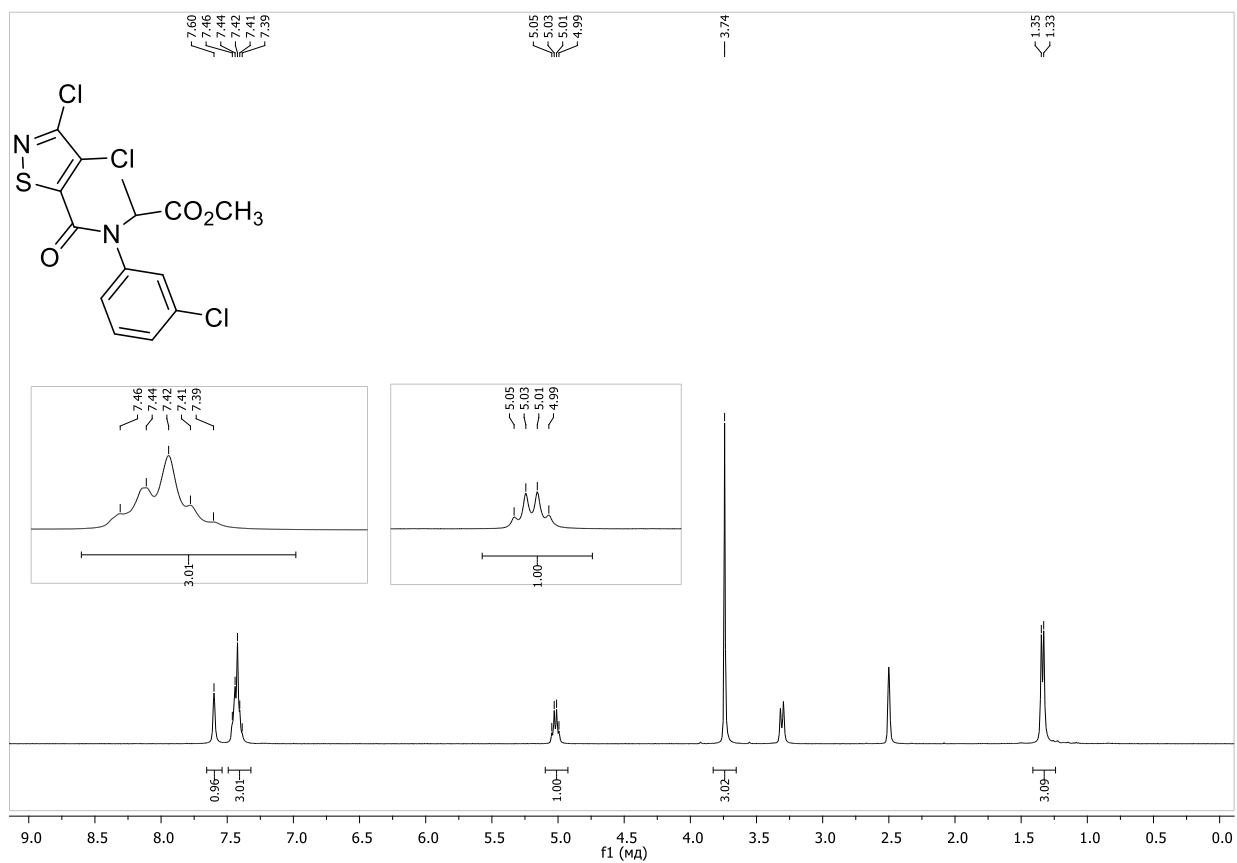

**Figure S42.** <sup>1</sup>H NMR of compound **2f**

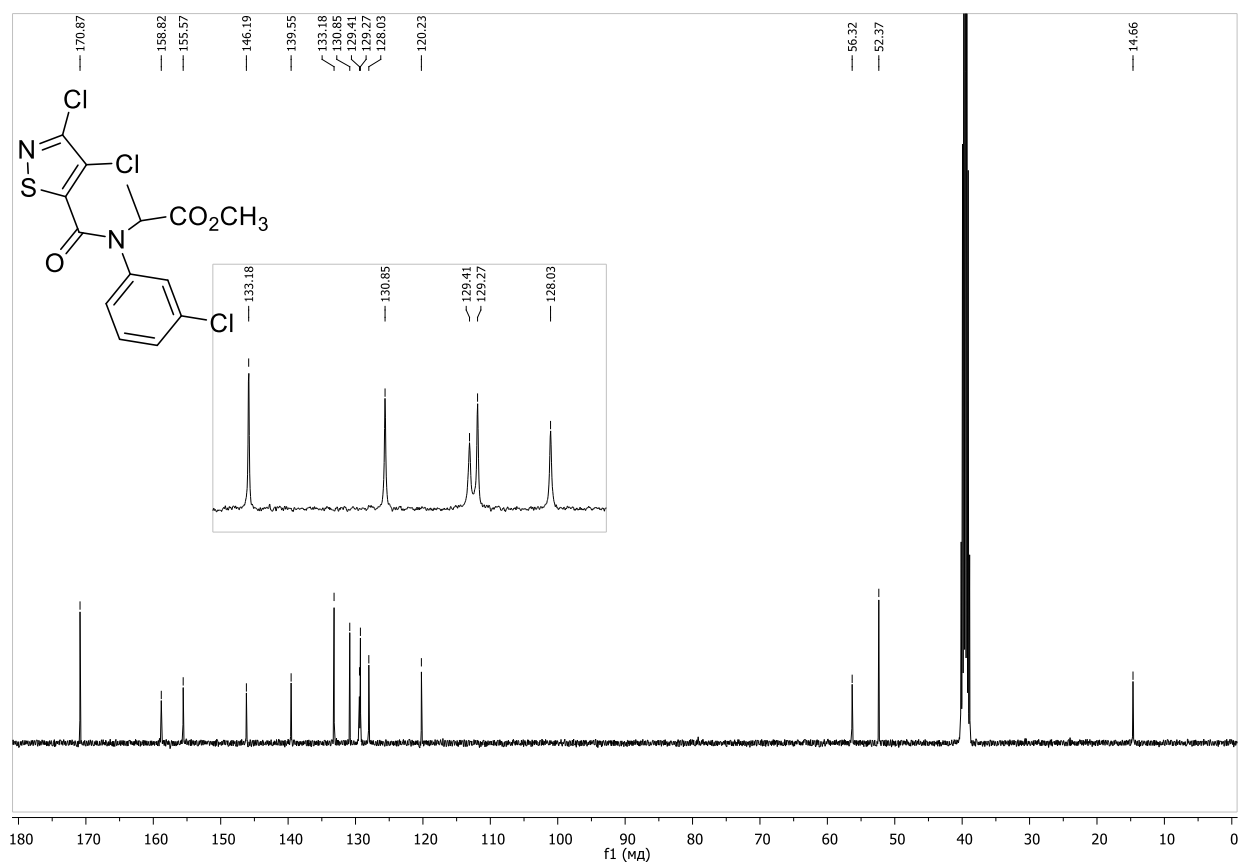

**Figure S43.** <sup>13</sup>C NMR of compound **2f**

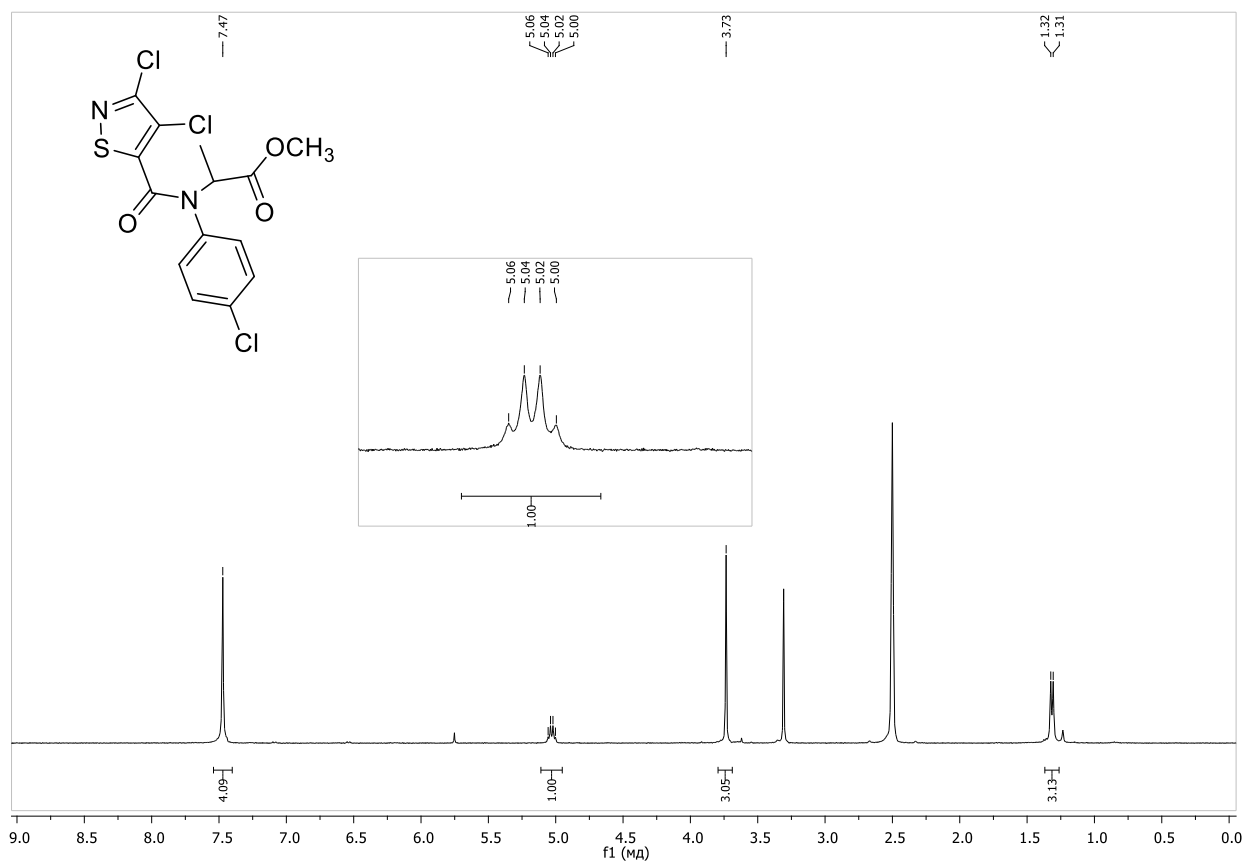

**Figure S44.** <sup>1</sup>H NMR of compound **2g**

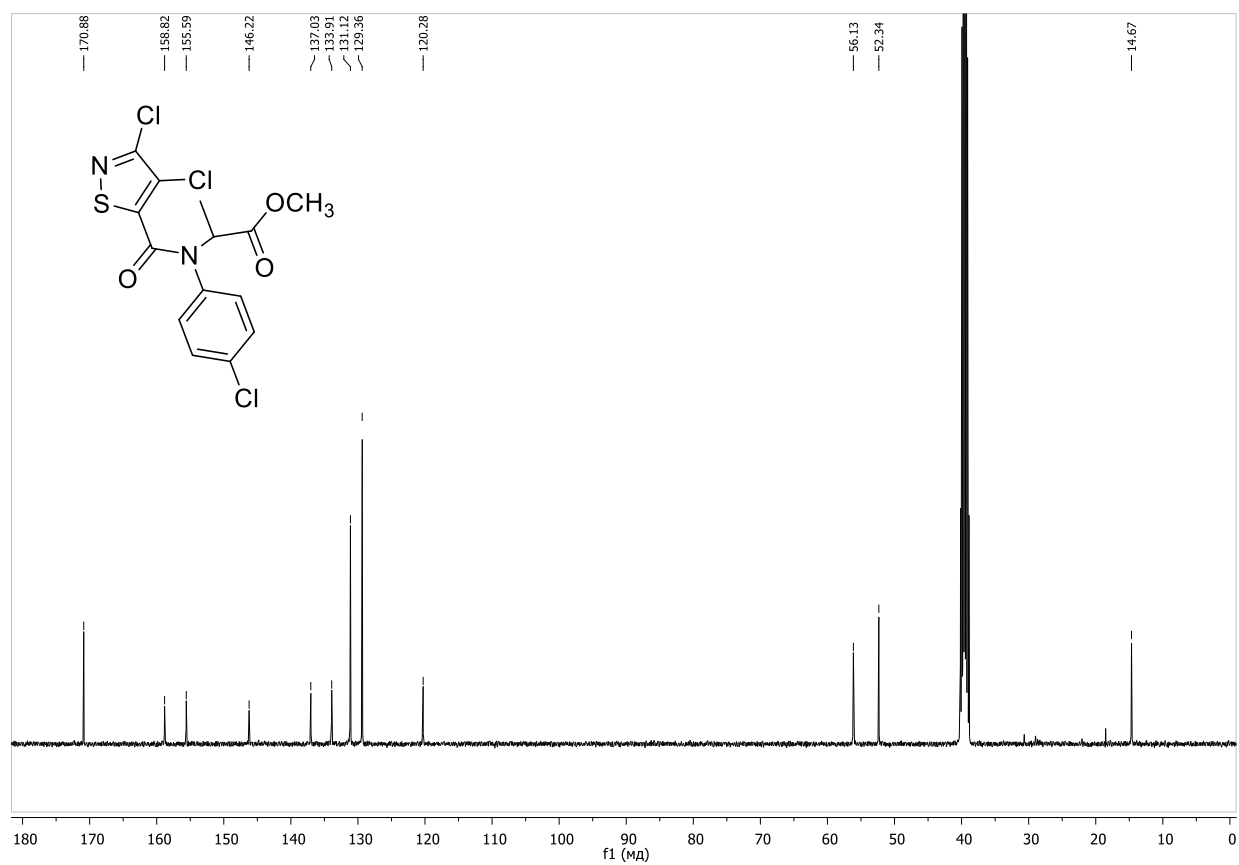

**Figure S45.** <sup>13</sup>C NMR of compound **2g**

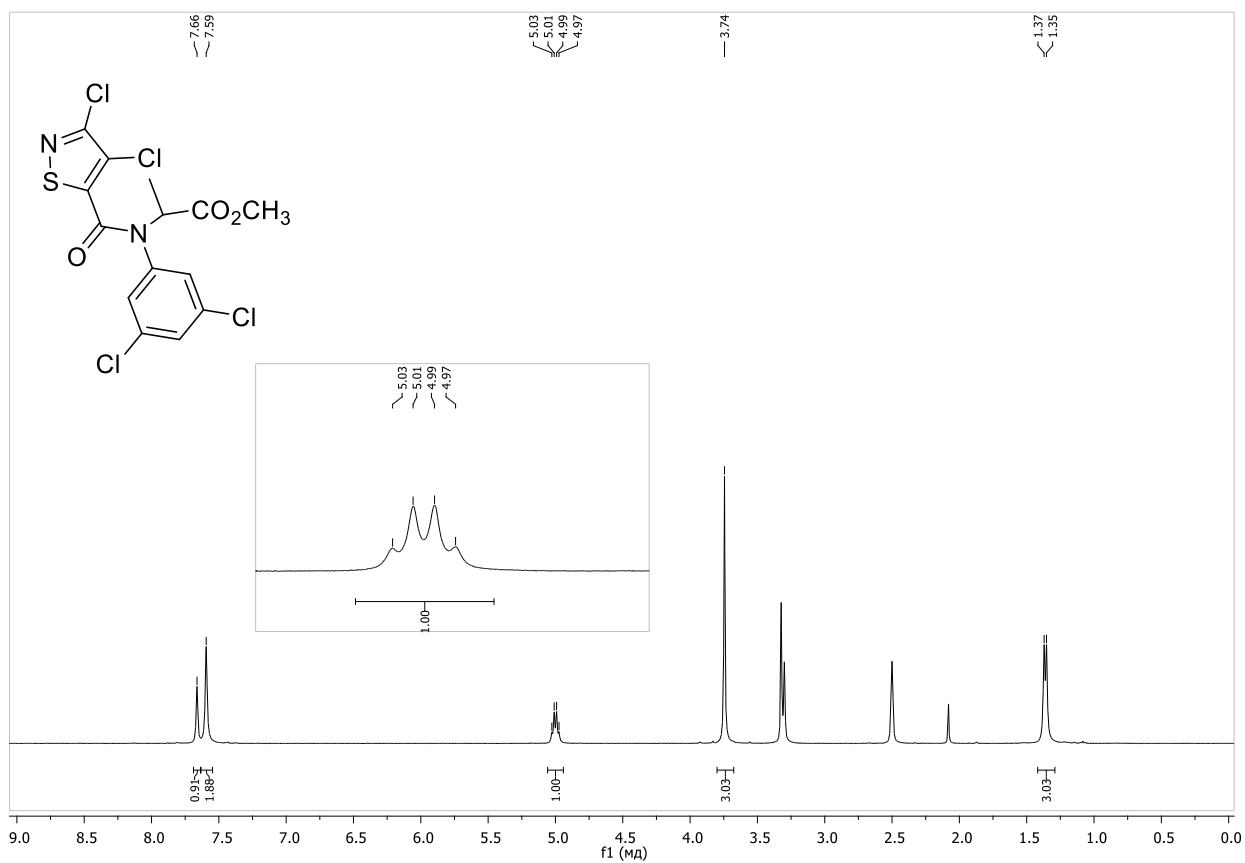

**Figure S46.** <sup>1</sup>H NMR of compound **2h**

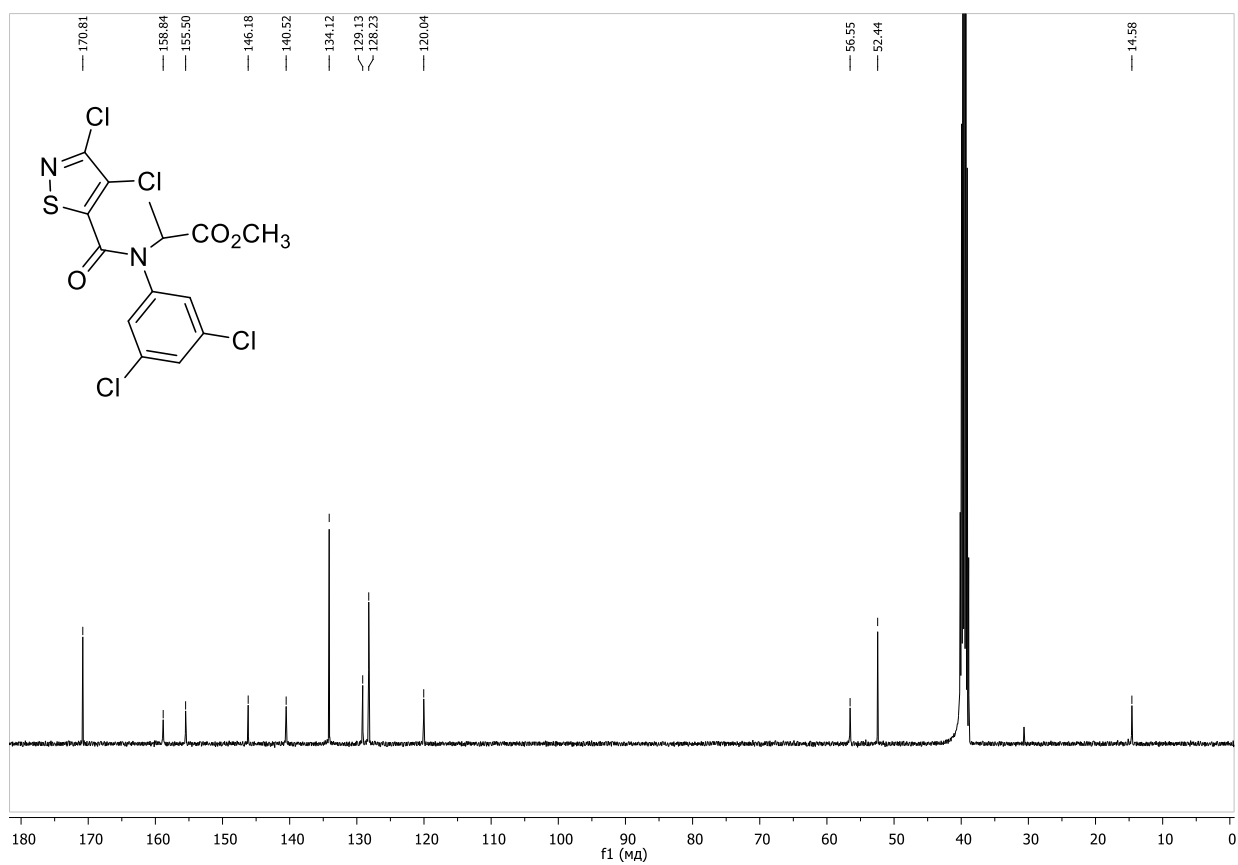

**Figure S47.** <sup>13</sup>C NMR of compound **2h**

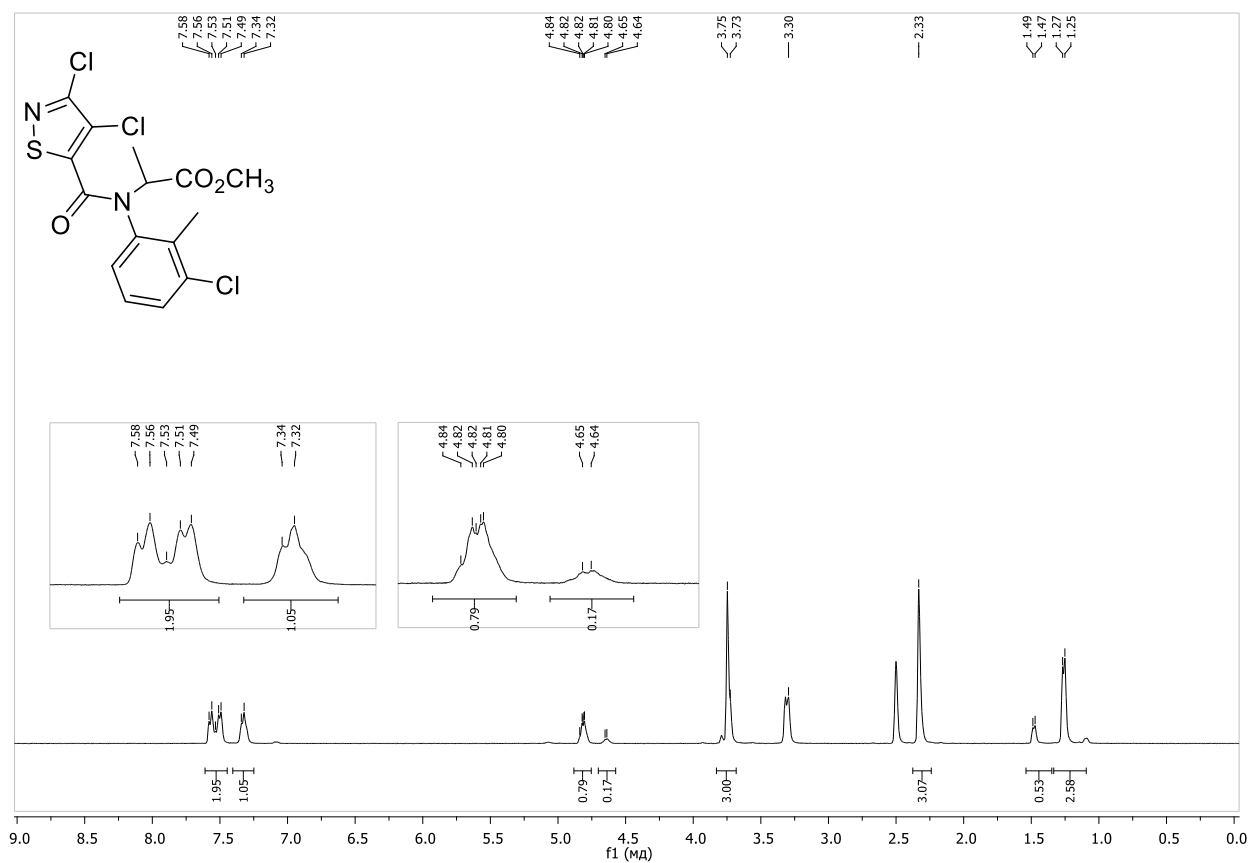

**Figure S48.** <sup>1</sup>H NMR of compound **2i**

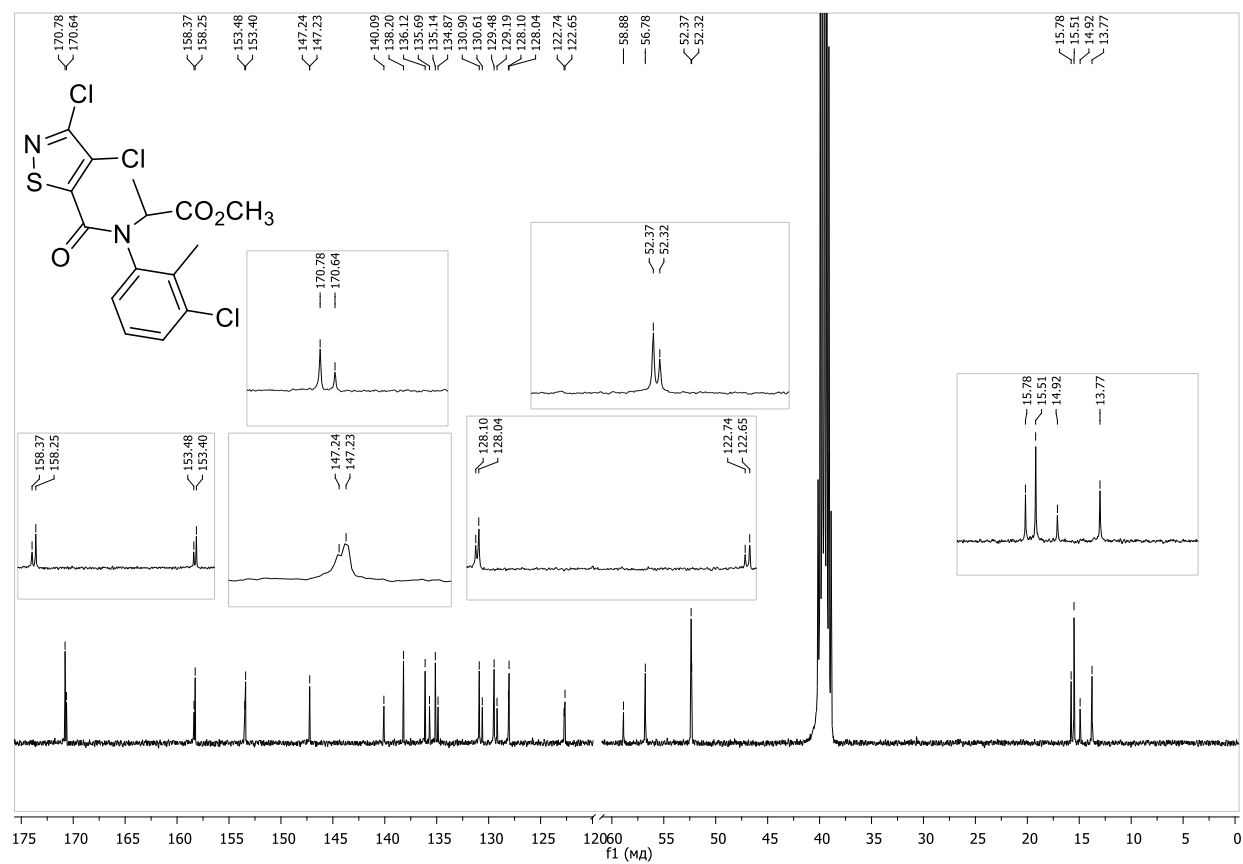

**Figure S49.** <sup>13</sup>C NMR of compound **2i**

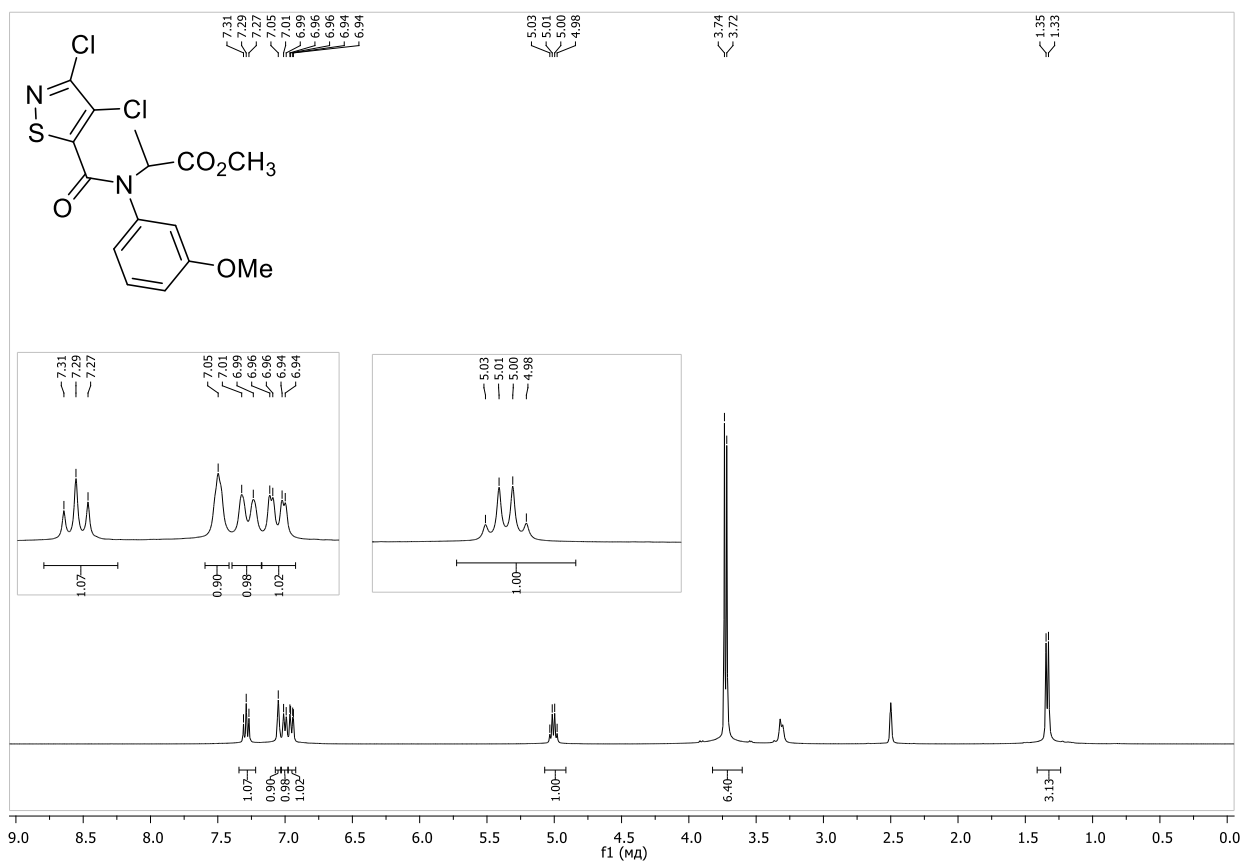

**Figure S50.** <sup>1</sup>H NMR of compound **2j**

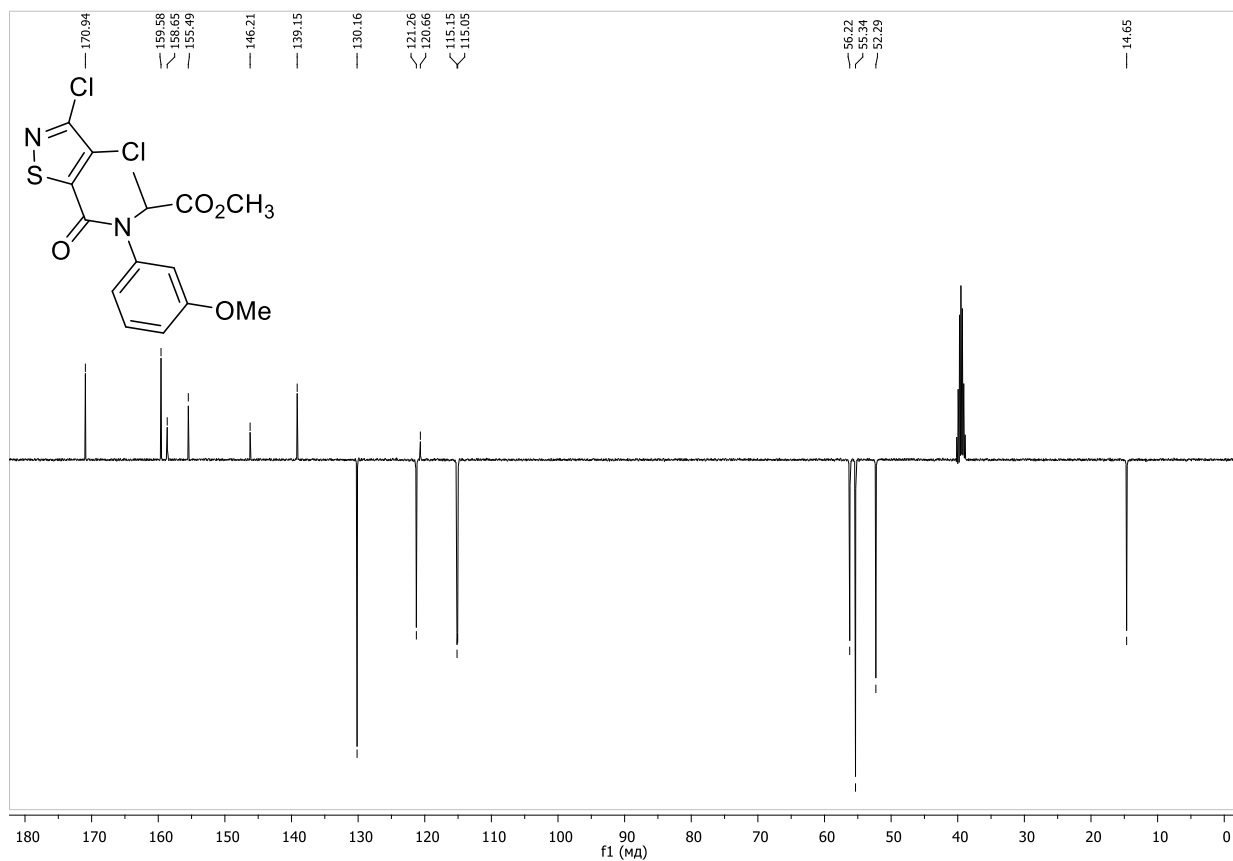

**Figure S51.** <sup>13</sup>C NMR of compound **2j**

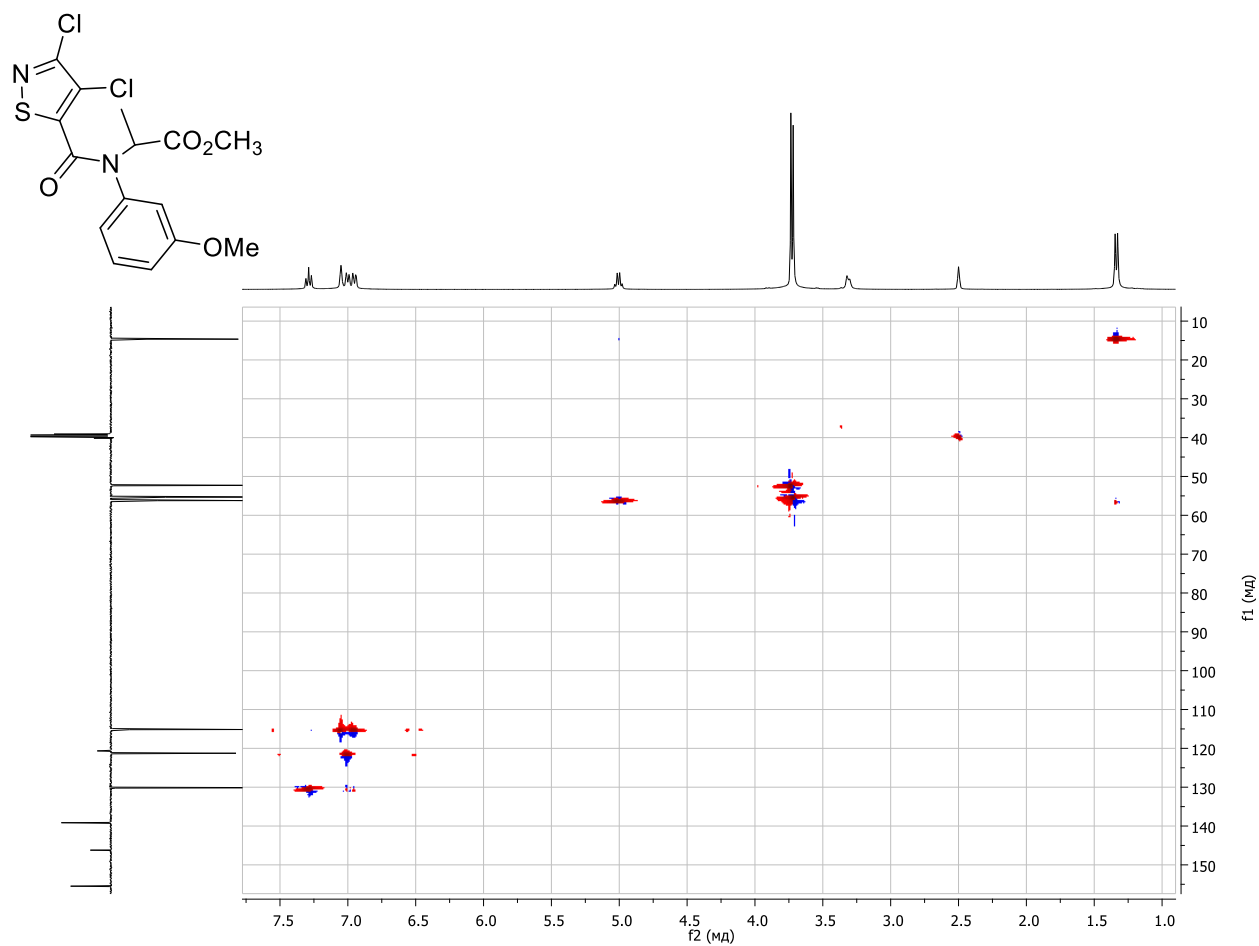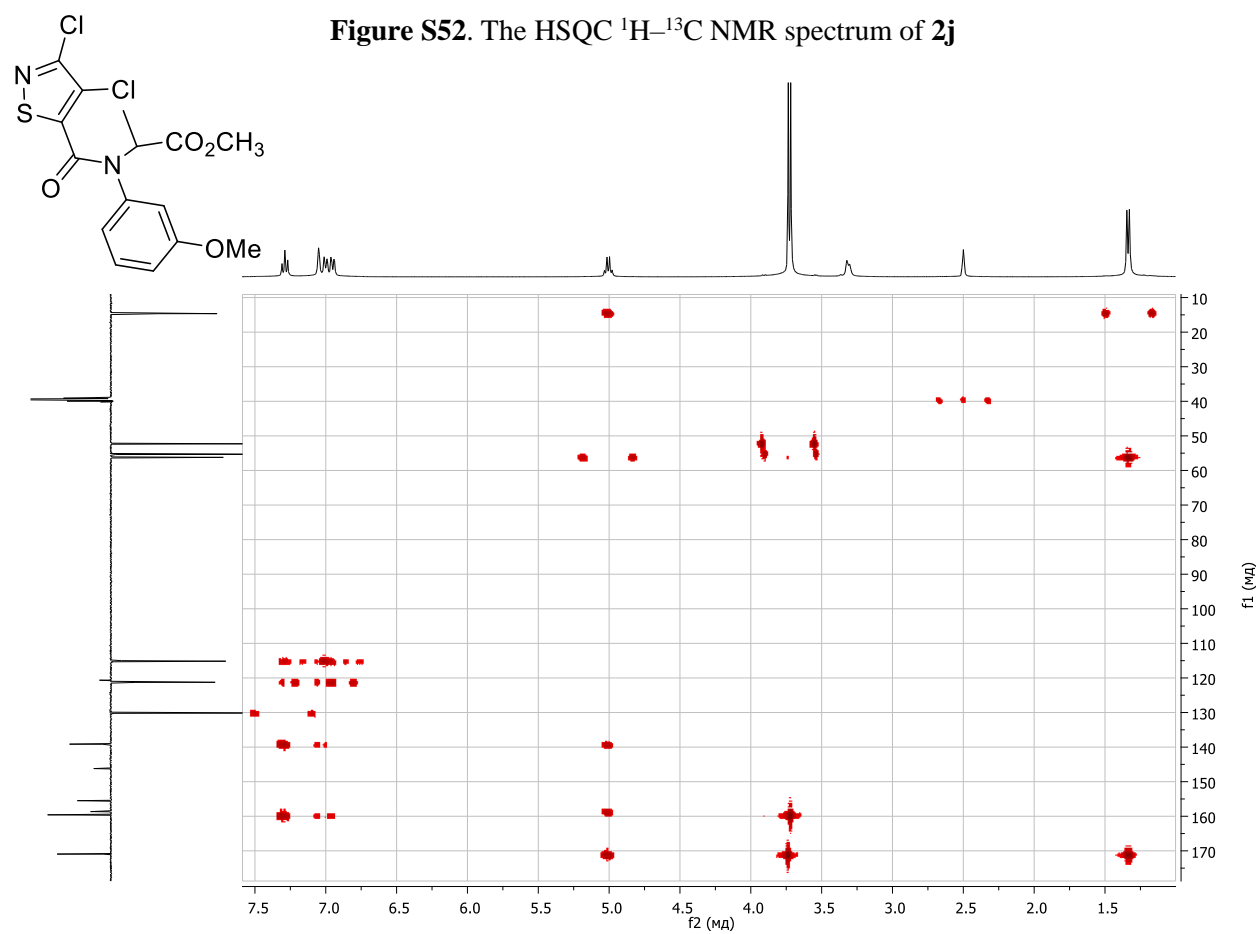

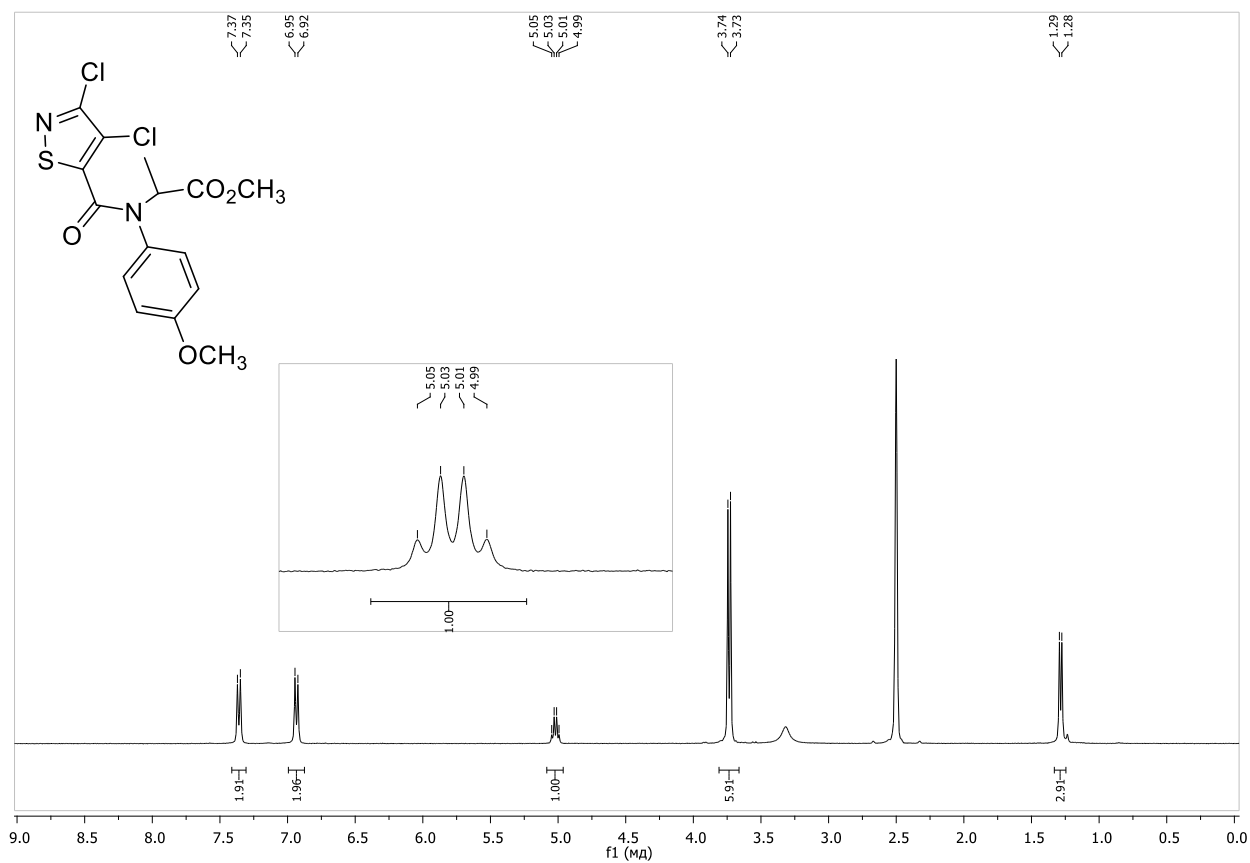

**Figure S54.** <sup>1</sup>H NMR of compound **2k**

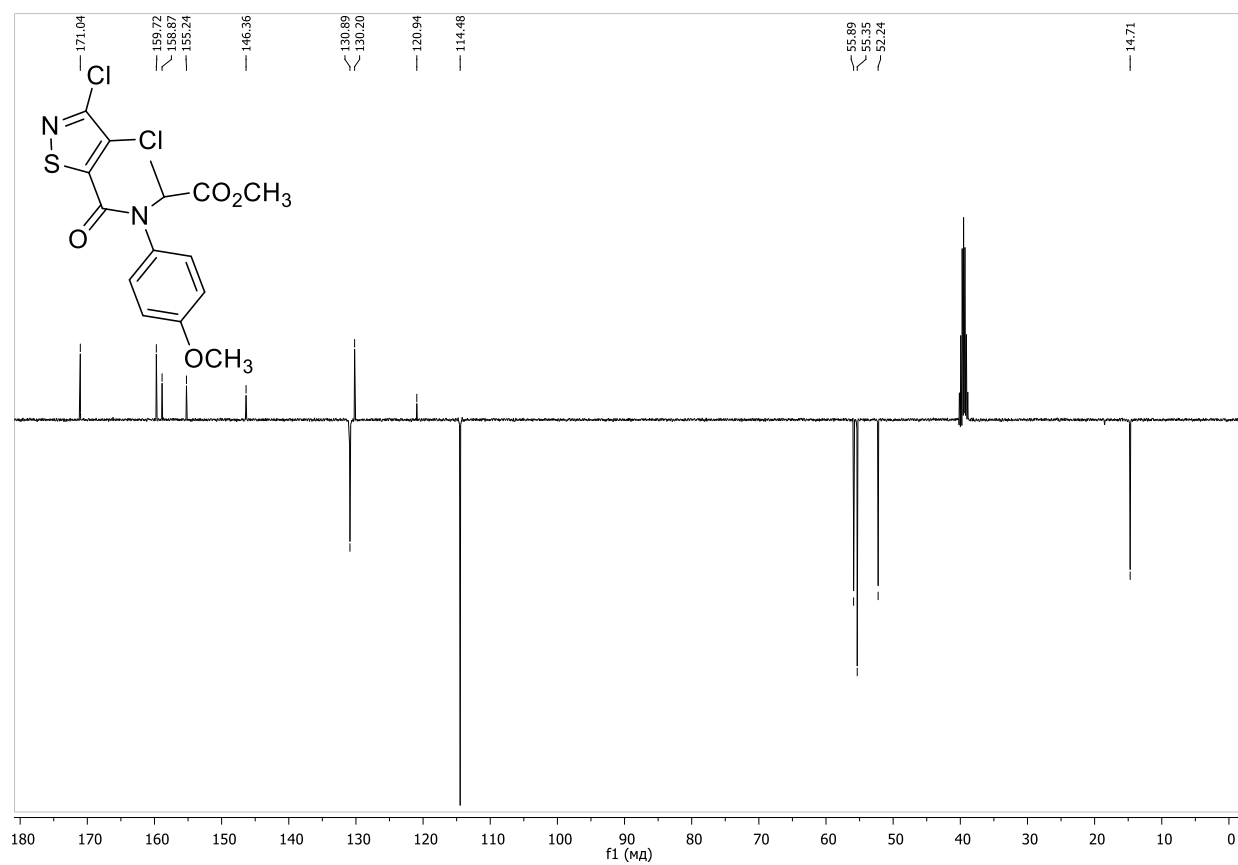

**Figure S55.** <sup>13</sup>C NMR of compound **2k**

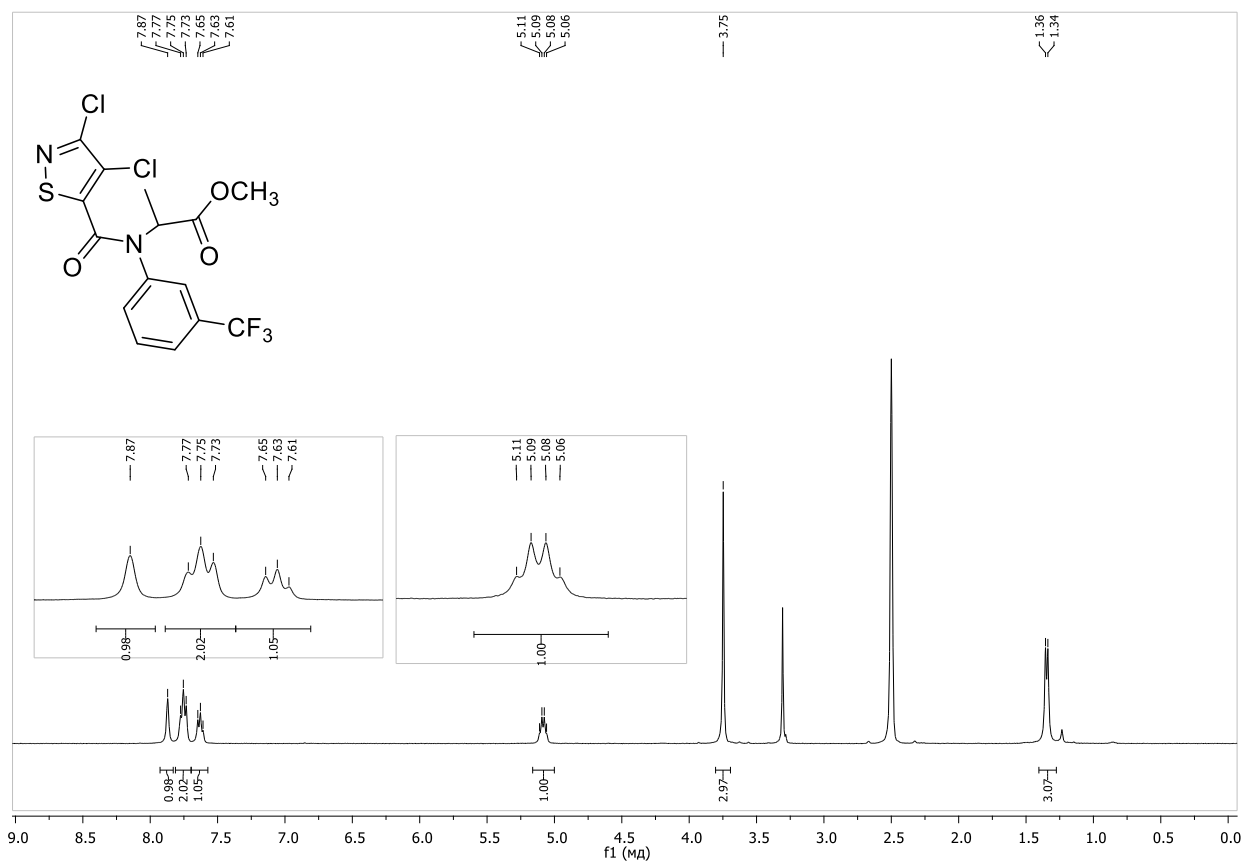

Figure S56. <sup>1</sup>H NMR of compound 2I

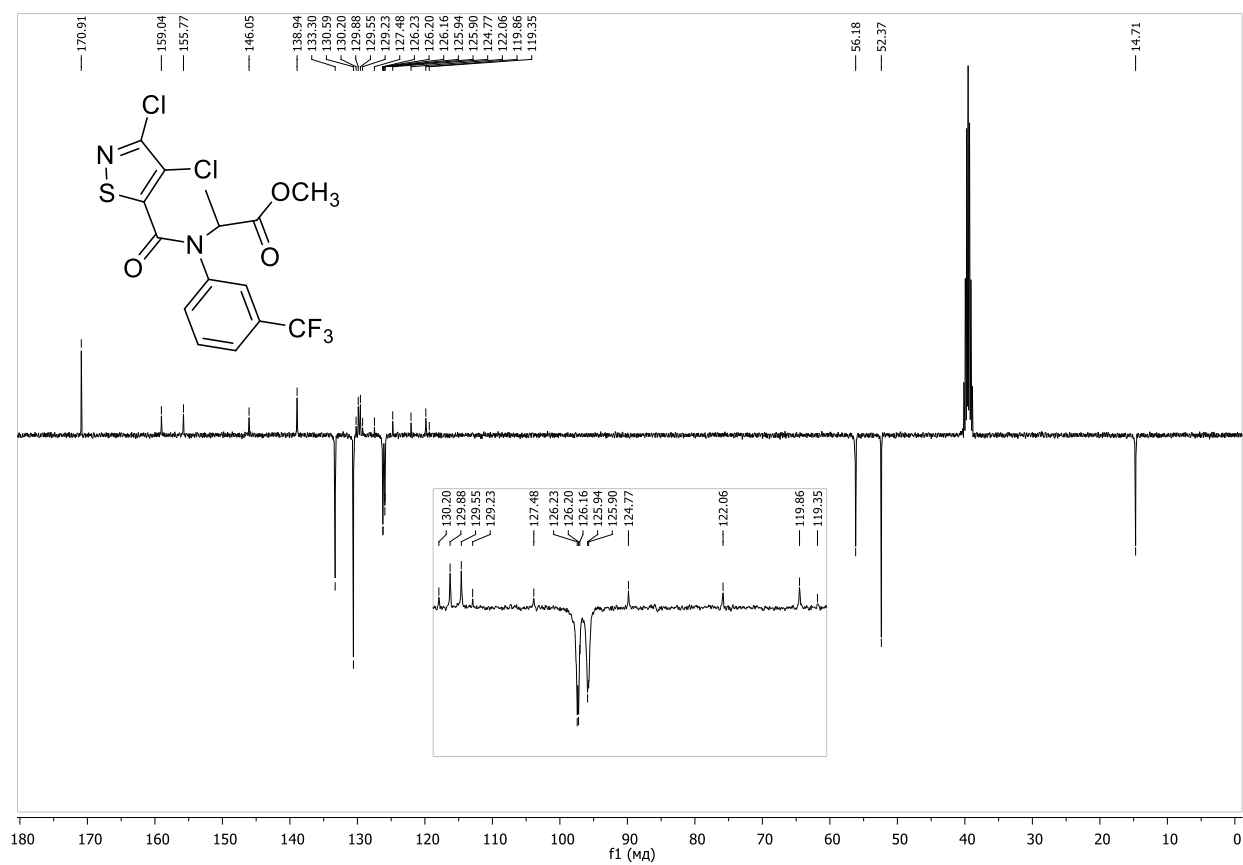

Figure S57. <sup>13</sup>C NMR of compound 2I
